# Supplementary material for: Uncovering tissue-specific endophytic microbiota composition and activity in Rhizophora mangle L.: a metagenomic and metatranscriptomic approach
Source: PeerJ journal article supplement (doi:10.7717/peerj.19728), 2025-08-28

## Experimental design

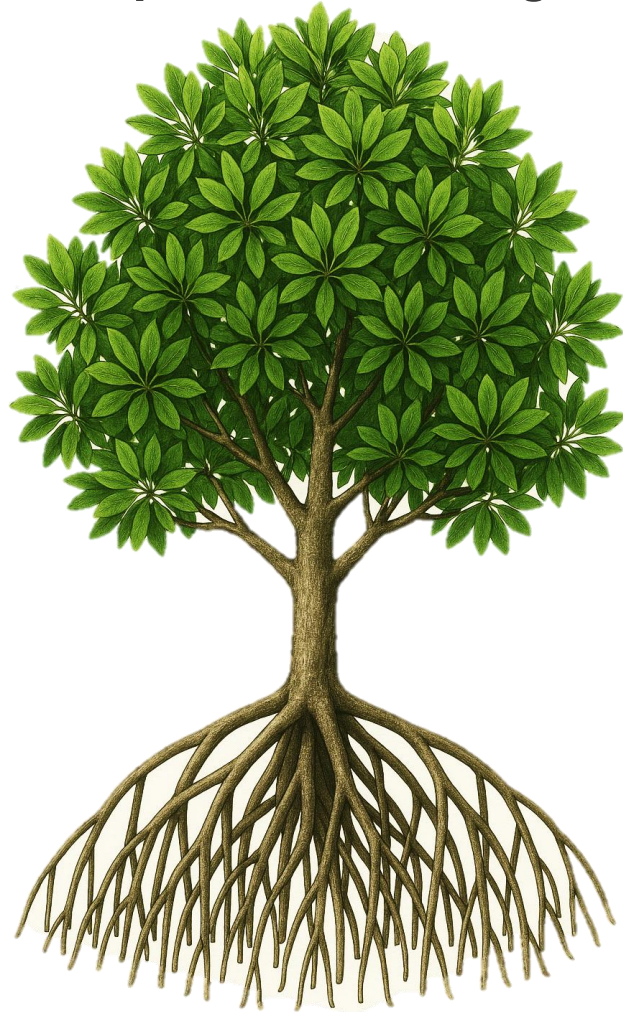

*Rhizophora mangle* L.

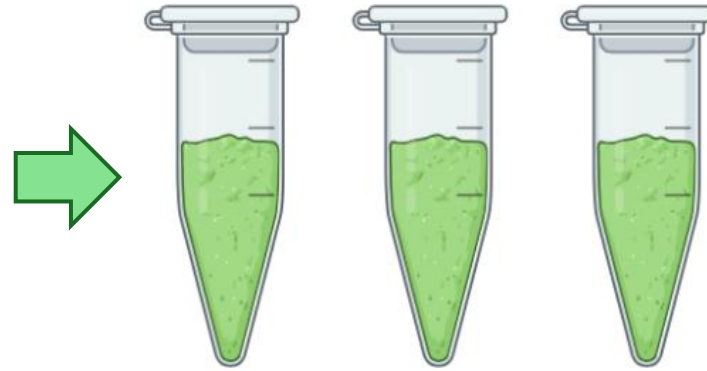

RmL1

RmL2

RmL3

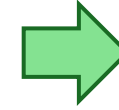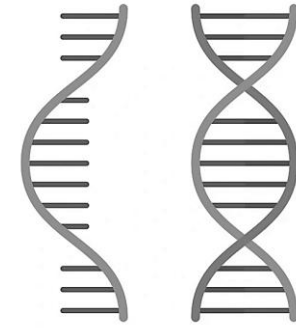

DNA and RNA extraction  
for each sample.

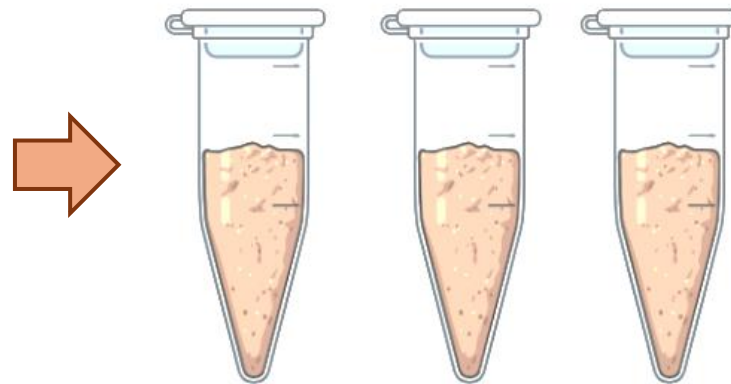

RmR1

RmR2

RmR3

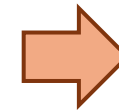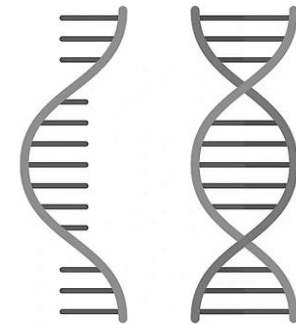

DNA and RNA extraction  
for each sample.

## Experimental design

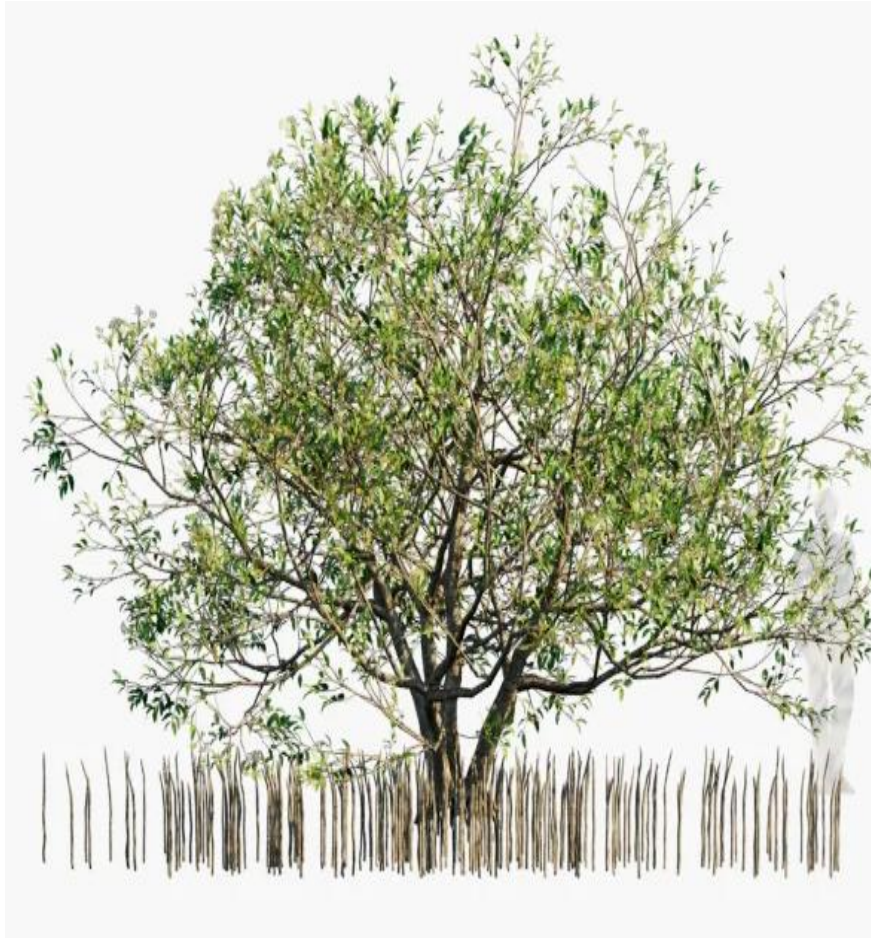

*Avicennia germinans* L.

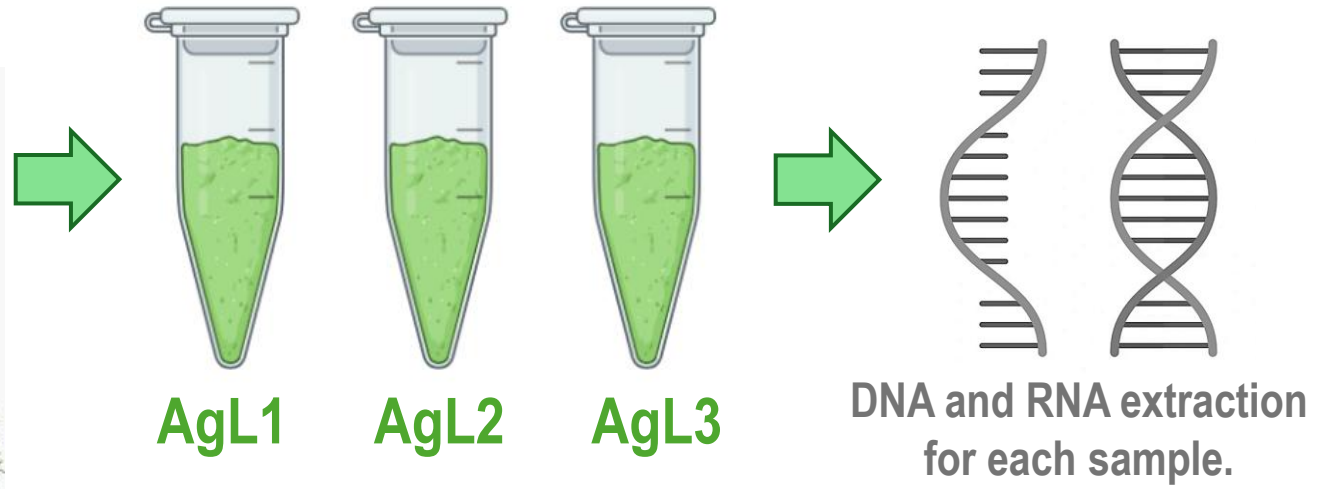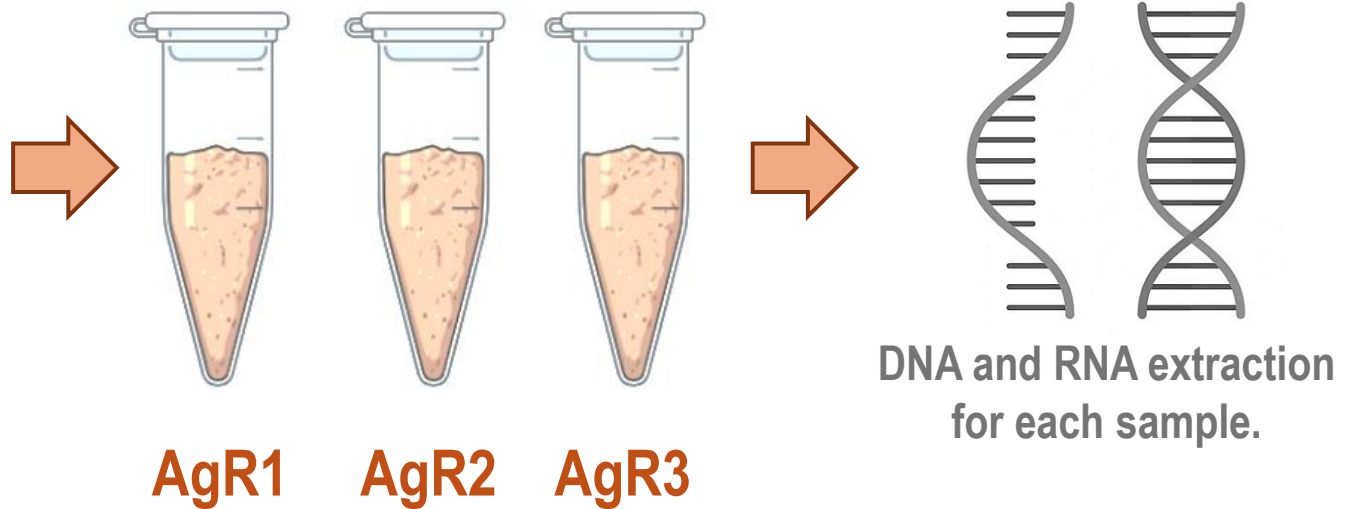

Supplement: FigureS3.pdf [file FigureS3.pdf]
