# Supplementary material for: Uncovering tissue-specific endophytic microbiota composition and activity in Rhizophora mangle L.: a metagenomic and metatranscriptomic approach
Source: PeerJ. 2025 Aug 28;13:e19728. doi: 10.7717/peerj.19728 (PMC12399087; doi:10.7717/peerj.19728)
Supplement: Supplemental Information 4 [file peerj-13-19728-s004.xlsx]

## Sheet: Tabla S4_V1 Rm
Transcript	RmH1	RmH2	RmH3	RmR1	RmR2	Total
NADH dehydrogenase subunit 4 (mitochondrion)	1874	886	667	3677	3079	10183
hypothetical protein, partial	1189	489	474	2367	1118	5637
NAD-dependent malic enzyme	1532	940	728	644	517	4361
ADP-ribosylation factor	272	613	242	1607	1005	3739
NADH dehydrogenase subunit 7 (mitochondrion)	783	454	282	973	815	3307
hypothetical protein SARC_00679	1040	455	221	1027	547	3290
subfamily a member 2-like partial	694	181	67	1581	755	3278
enolase	770	396	261	937	744	3108
kinase-like domain-containing protein	1045	600	384	597	446	3072
catalase	345	703	1026	477	314	2865
putative ubiquitin conjugating enzyme	535	626	505	477	456	2599
P-loop containing nucleoside triphosphate hydrolase protein	752	357	352	615	355	2431
glutamine synthetase	986	406	765	60	25	2242
NADH dehydrogenase subunit 1 (mitochondrion)	467	401	212	533	333	1946
aspartic proteinase, partial	592	546	446	154	175	1913
NADH dehydrogenase subunit 5 (mitochondrion)	575	238	144	591	356	1904
Glycogen synthase kinase 1	742	250	223	304	249	1768
aldehyde dehydrogenase family protein	464	346	218	402	270	1700
GH1 family beta-glucosidase	589	400	319	195	126	1629
uncharacterized protein C8R40DRAFT_1094979	65	368	128	659	405	1625
uncharacterized protein M409DRAFT_65648	550	249	318	184	145	1446
putative ubiquitin-conjugating enzyme e2-16 kda	374	194	166	354	287	1375
glutamate synthase (chloroplast)	446	292	428	128	50	1344
Exportin-1	478	296	349	72	44	1239
ubiquitin-conjugating enzyme	366	267	200	214	173	1220
casein kinase I	461	196	153	229	165	1204
cytochrome c oxidase subunit 1 (mitochondrion)	43	27	24	854	249	1197
glyceraldehyde-3-phosphate dehydrogenase	259	308	337	146	137	1187
photosystem II q(b) protein, partial	90	33	36	913	89	1161
GTP-binding protein ypt1	510	180	192	154	124	1160
hypothetical protein AGABI2DRAFT_184516	396	229	174	177	159	1135
NADH dehydrogenase subunit 2 (mitochondrion)	369	124	83	265	255	1096
P-type ATPase	346	193	140	277	138	1094
kinase-like protein	335	176	168	261	152	1092
photosystem II reaction center protein D1 (chloroplast)	5	43	3	926	81	1058
photosystem II protein D1 (chloroplast)	100	57	65	687	62	971
clathrin heavy chain 1	261	179	114	252	152	958
CMGC/GSK protein kinase	383	161	100	155	123	922
40S ribosomal protein S6e	297	111	79	256	164	907
photosystem II q(b) protein	324	58	137	321	64	904
ATP-dependent zinc metalloprotease FtsH	317	101	120	264	101	903
apocytochrome b (mitochondrion)	19	18	9	628	227	901
armadillo-type protein	309	130	103	256	88	886
ubiquitin-like protein, partial	242	169	128	201	133	873
type I glyceraldehyde-3-phosphate dehydrogenase	304	175	271	43	39	832
glyceraldehyde 3-phosphate dehydrogenase	305	150	170	90	90	805
hypothetical protein	92	44	36	547	75	794
phosphopyruvate hydratase	189	81	98	243	179	790
photosystem II reaction center protein D1 (plastid)	13	20	7	654	83	777
5-methyltetrahydropteroyltriglutamate-homocysteine S-methyltransferase	223	189	126	118	114	770
Casein kinase I-like hhp1	213	155	110	159	111	748
hypothetical protein GUITHDRAFT_91319	224	187	111	66	103	691
eukaryotic translation initiation factor 5A	115	167	139	131	129	681
uncharacterized protein O0I10_001431	522	39	68	27	25	681
Casein kinase-like protein	256	100	91	123	106	676
uncharacterized protein HO173_010477	233	128	157	84	64	666
isocitrate/isopropylmalate family dehydrogenase, partial	386	63	117	61	35	662
CMGC MAPK protein kinase	197	157	115	116	66	651
lysosomal alpha-mannosidase	294	99	101	100	56	650
microtubial binding protein	146	163	171	81	88	649
V-type proton ATPase catalytic subunit A	273	126	112	75	63	649
protein kinase, partial	223	128	104	124	61	640
hypothetical protein EMIHUDRAFT_464769	209	55	44	202	129	639
WD40-repeat-containing domain protein	108	50	49	261	159	627
clathrin heavy chain	229	115	69	141	72	626
Myosin type-2 heavy chain 1	216	109	86	113	97	621
hypothetical protein GUITHDRAFT_160160	207	73	153	99	67	599
hypothetical protein CNBA5450	123	185	162	68	54	592
TRRAP family protein, partial	199	95	84	146	65	589
Myo-inositol-1-phosphate synthase	267	178	132	6	5	588
cytochrome c oxidase subunit 2 (mitochondrion)	108	44	30	263	141	586
malate dehydrogenase, NAD-dependent	204	149	157	41	34	585
ARM repeat-containing protein	81	117	64	163	141	566
serine/threonine protein kinase	163	125	90	126	57	561
hypothetical protein, variant 2	141	112	216	47	28	544
Carbohydrate esterase family 9 protein	156	102	65	130	66	519
peroxidase family protein, partial	219	55	88	88	66	516
uncharacterized protein HO133_003712	308	60	86	25	36	515
serine hydroxymethyltransferase	156	115	165	30	31	497
glutathione peroxidase	189	103	117	46	33	488
cytochrome b (mitochondrion)	14	16	14	302	137	483
ribulose-1,5-bisphosphate carboxylase/oxygenase large subunit (chloroplast)	87	23	39	292	42	483
cathepsin D	320	64	54	28	14	480
hypothetical protein GUITHDRAFT_68759, partial	118	114	67	118	59	476
molecular chaperone DnaK	110	100	145	71	49	475
Fumarylacetoacetate hydrolase	178	81	116	48	47	470
pyruvate kinase	195	62	64	94	55	470
glutamate--ammonia ligase	276	71	100	13	9	469
hypothetical protein SAMD00019534_114270	172	79	50	108	55	464
rab GDP dissociation inhibitor beta	110	45	48	151	108	462
uncharacterized protein INS49_000551	148	122	176	11	0	457
CMGC/CDK protein kinase	102	97	74	101	80	454
glutamine synthetase 2	262	57	122	9	4	454
phosphoglucomutase	135	118	85	79	36	453
V-type ATPase, V0 complex, 116kDa subunit family	197	85	62	56	53	453
uncharacterized protein BABINDRAFT_161796	257	35	60	47	53	452
cytochrome c oxidase subunit 3 (mitochondrion)	16	11	7	334	83	451
hypothetical protein SCP_0106320	138	99	108	56	37	438
MULTISPECIES: ubiquitin-like protein, partial	180	89	62	63	41	435
hypothetical protein H310_00139	46	103	68	99	114	430
60S ribosomal protein L7e	53	63	25	159	127	427
cbb3-type cytochrome c oxidase subunit I, partial	0	1	4	295	122	422
uncharacterized protein BX663DRAFT_145319	67	80	123	90	62	422
lysosomal aspartic protease	232	74	70	26	17	419
NADH-quinone oxidoreductase subunit N	121	71	38	92	92	414
uncharacterized protein BATDEDRAFT_34590	138	67	72	77	59	413
aldehyde dehydrogenase	101	74	61	88	86	410
uncharacterized protein MELLADRAFT_117357	86	78	31	125	87	407
uncharacterized protein MONBRDRAFT_19294	107	74	46	122	57	406
V-type ATPase	103	93	63	91	52	402
hypothetical protein GLOIN_2v1635118	16	94	25	162	103	400
ubiquitin-conjugating enzyme E2 D	70	86	53	100	91	400
Nad2 (mitochondrion)	73	40	29	133	124	399
glutamine synthetase 1	154	59	123	29	32	397
hypothetical protein H696_01804	35	26	13	223	94	391
uncharacterized protein BX661DRAFT_199836	115	58	60	98	60	391
translation initiation factor SUI1, partial	123	42	34	112	77	388
Pkinase-domain-containing protein	102	62	73	110	38	385
uncharacterized protein SPPG_06913	166	68	55	44	50	383
hypothetical protein EMIHUDRAFT_438269	145	39	39	88	71	382
ras-domain-containing protein	63	75	112	70	62	382
1,3-beta-glucan synthase	154	25	32	135	34	380
hypothetical protein POSPLADRAFT_1041472	109	83	109	40	38	379
uncharacterized protein ASPWEDRAFT_180924	50	87	87	79	72	375
putative ATP citrate lyase subunit 1	233	46	70	8	16	373
Cdk-PSTAIRE	124	71	38	89	48	370
neutral sphingomyelinase activation associated factor	144	75	56	40	55	370
cytochrome c reductase cytochrome c1 subunit	158	63	50	56	42	369
dynamin-2	164	52	62	40	51	369
molecular chaperone DnaJ	116	68	74	54	53	365
ABC transporter ATP-binding protein	175	76	77	25	11	364
60S ribosomal protein L5	84	72	65	79	62	362
uncharacterized protein C8R40DRAFT_1164060	171	47	66	38	36	358
ribosomal protein s4 X isoform	160	67	36	54	39	356
UBC-like protein	84	88	75	50	59	356
aldo/keto reductase	164	49	39	53	49	354
small GTP-binding protein	133	47	92	41	41	354
AAA family ATPase, partial	145	65	44	58	41	353
ATP citrate synthase	254	40	43	8	5	350
ATP synthase alpha/beta family, nucleotide-binding domain-containing protein	155	72	41	43	36	347
uncharacterized protein K450DRAFT_259338	74	83	57	73	58	345
putative GTP-binding ADP-ribosylation factor	106	58	18	86	72	340
hypothetical protein POSPLADRAFT_1035341	122	40	43	85	49	339
S-(hydroxymethyl)glutathione dehydrogenase/class III alcohol dehydrogenase	59	67	41	87	84	338
photosystem II core 32 kDaprotein (chloroplast)	6	7	0	318	5	336
uncharacterized protein BC939DRAFT_503617	71	69	33	100	62	335
Aldehyde/histidinol dehydrogenase	124	55	34	70	50	333
T-complex protein 1 subunit alpha	141	46	51	72	22	332
glycogen synthase kinase-like protein-3 beta	121	59	54	52	44	330
Type I HSP40 co-chaperone	17	74	21	131	86	329
14-3-3 protein	107	48	41	89	43	328
Magnesium-protoporphyrin IX monomethyl estercyclase (chloroplast)	59	83	166	18	2	328
myosin-5b	103	59	38	86	42	328
VATPase subunit A, putative	126	59	54	48	41	328
predicted protein	124	66	24	71	40	325
hypothetical protein SAMD00019534_123360, partial	47	24	6	150	95	322
clathrin-adaptor gamma chain	155	42	30	59	35	321
hypothetical protein SPRG_12471	116	46	39	74	45	320
actin	71	16	20	126	85	318
glycoside hydrolase family 1 protein	110	103	53	37	14	317
acyl-CoA dehydrogenase family protein	120	42	36	82	34	314
uncharacterized protein COCC4DRAFT_32392	62	56	75	45	71	309
oxaloacetate-decarboxylating malate dehydrogenase, partial	40	90	54	69	55	308
uncharacterized protein BDB00DRAFT_929474	59	60	32	88	69	308
cytochrome P450	70	41	63	99	34	307
dynamin central region family protein	118	52	44	62	30	306
RNA helicase	82	48	35	89	51	305
ubiquitin-conjugating enzyme E2	78	51	67	65	44	305
GTP-binding protein, partial	16	7	3	197	79	302
phosphatidylinositol 3-kinase	68	78	39	72	44	301
uncharacterized protein NAEGRDRAFT_60237	223	25	27	15	11	301
exportin-1	69	39	43	103	44	298
methylmalonate-semialdehyde dehydrogenase	119	69	40	45	24	297
40S ribosomal protein	20	67	57	84	65	293
hypothetical protein, variant 8	122	39	40	70	21	292
pepsin-like aspartyl protease, partial	95	70	72	27	28	292
SulP family inorganic anion transporter	105	80	25	54	27	291
photosynthetic reaction center protein, partial	25	14	27	202	22	290
uncharacterized protein N7468_006318	28	17	10	154	81	290
asparagine synthase B	62	50	17	103	55	287
ornithine--oxo-acid transaminase	124	36	44	64	18	286
oxidoreductase	101	37	32	78	36	284
vacuolar ATP synthase subunit B, variant	105	70	40	41	28	284
30S ribosomal protein S17, partial	64	56	61	47	55	283
calciumtranslocating P-type ATPase, PMCA-type, putative	106	45	42	62	27	282
ribosomal protein L1 (plastid)	161	47	50	18	6	282
phycoerythrin subunit b (chloroplast)	13	4	0	251	8	276
beta-galactosidase family protein	191	30	19	19	16	275
hypothetical protein, variant	67	36	25	92	55	275
alanine--glyoxylate aminotransferase family protein	180	33	54	5	2	274
Cu,Zn superoxide dismutase SOD1	35	47	59	73	58	272
CAMK/CAMK1 protein kinase	85	48	32	60	46	271
peroxiredoxin	46	66	82	52	25	271
uncharacterized protein CcaverHIS019_0406110	67	60	60	43	39	269
ATP citrate lyase isoform 2	188	24	32	14	10	268
uncharacterized protein KABA2_01S10120	259	3	6	0	0	268
photosystem II core 32 kDa protein (chloroplast)	5	18	20	214	10	267
sugar porter family MFS transporter	54	75	40	60	37	266
hypothetical protein EMIHUDRAFT_464692	44	68	64	38	51	265
TCP-1/cpn60 chaperonin family protein, partial	30	39	63	95	38	265
ADP-ribosylation factor-like protein, partial	53	49	16	88	58	264
putative serine/threonine kinase	53	66	44	57	42	262
ribosomal protein S32, putative	74	63	35	57	33	262
FAT-domain-containing protein	85	63	39	51	22	260
sodium/hydrogen exchanger family protein	39	76	53	54	38	260
AcylCoA oxidase	101	42	55	39	21	258
DUF625-domain-containing protein	88	44	40	46	40	258
vacuolar ATP synthase subunit B, putative, partial	91	56	35	41	33	256
uncharacterized protein DFA_01581	68	29	13	83	61	254
aldehyde dehydrogenase family protein, partial	34	91	73	29	26	253
Glucose-6-phosphate 1-dehydrogenase	93	39	17	67	36	252
type I glyceraldehyde-3-phosphate dehydrogenase, partial	51	67	71	24	39	252
CAMK/CAMKL/AMPK protein kinase	66	54	37	57	37	251
cobalamin-independent synthase	108	41	38	22	42	251
elongation factor G	81	25	29	76	40	251
hypothetical protein PHYSODRAFT_286116	80	22	20	73	56	251
photosystem II protein D1 (plastid)	16	22	18	155	40	251
photosystem I core protein PsaA	46	9	2	162	31	250
AMP-dependent synthetase/ligase	208	10	24	7	0	249
phenylalanyl-tRNA synthetase subunit beta	78	59	34	48	30	249
uncharacterized protein NAEGRDRAFT_71941	57	61	61	44	26	249
large subunit ribosomal protein 1	132	26	44	36	10	248
Ribokinase-like protein	114	39	30	32	33	248
F0F1 ATP synthase subunit beta	53	51	38	69	34	245
uncharacterized protein MONBRDRAFT_28892	114	24	32	39	35	244
serine/threonine protein kinase, putative	79	55	34	47	28	243
pre-mRNA-processing-splicing factor 8	75	21	18	92	36	242
calcium-translocating P-type ATPase, PMCA-type	121	25	30	48	15	239
photosystem I P700 apoprotein A1 (chloroplast)	49	5	21	150	14	239
enoyl-CoA hydratase	121	45	37	21	14	238
FFD and TFG box motifscontaining protein	18	42	39	90	49	238
glucose-6-phosphate isomerase	59	32	44	63	40	238
Glutamine synthetase	162	17	40	8	11	238
uncharacterized protein BJ171DRAFT_490747	44	31	31	80	52	238
HECT-domain-containing protein	63	43	36	54	38	234
eukaryotic translation initiation factor 4E	84	9	15	88	37	233
F0F1 ATP synthase subunit A, partial	0	1	0	140	92	233
ADP ribosylation factor	9	17	19	124	63	232
cobalamin-independent methionine synthase	100	41	23	31	36	231
uncharacterized protein MONBRDRAFT_32562	186	10	27	5	3	231
D-hydantoinase family protein	65	61	71	14	19	230
plasma membrane H+-ATPase	115	35	22	35	23	230
hypothetical protein GUITHDRAFT_162097	91	50	29	38	21	229
uncharacterized protein MONBRDRAFT_32800	45	76	49	39	20	229
40S ribosomal protein S18	124	37	25	22	18	226
hypothetical protein PHYSODRAFT_349235	50	48	38	57	33	226
uncharacterized protein	106	36	34	31	19	226
vacuolar H+-ATPase A subunit	46	75	54	28	23	226
eS7 family ribosomal protein, partial	86	16	17	84	22	225
GTP-binding nuclear protein Ran	36	54	77	33	25	225
heat shock protein gp96	72	36	71	34	11	224
UDPN-acetylglucosamine-dolichyl-phosphate N-acetylglucosaminephosphotransferase isoform 6, putative	73	44	44	24	39	224
protein kinase gsk3	72	37	27	40	46	222
uncharacterized protein FVRRES_13538	91	30	27	55	19	222
polymerase	84	19	39	48	31	221
hypothetical protein PHYBLDRAFT_129273	65	38	27	52	38	220
uncharacterized protein O0I10_011069	93	33	15	54	25	220
unnamed protein product	99	21	18	47	35	220
40S ribosomal protein S4-A	98	50	27	20	24	219
actin-1, putative	4	1	2	133	79	219
Hsp70 family protein, partial	32	5	18	113	51	219
hypothetical protein IMG5_064870	53	71	73	15	7	219
uncharacterized protein AMSG_12293	92	37	35	32	23	219
MULTISPECIES: NAD-dependent malic enzyme	74	56	36	32	19	217
putative cytochrome P450 oxidoreductase	93	47	35	24	18	217
nucleophile aminohydrolase	148	24	17	13	14	216
putative protein serine/threonine kinase	79	13	14	68	42	216
S9 family peptidase	68	58	36	27	27	216
uncharacterized protein F5J12DRAFT_223322	115	32	39	14	16	216
isocitrate dehydrogenase [NADP] cytoplasmic	134	31	37	9	4	215
NADP-dependent isocitrate dehydrogenase	159	10	22	7	17	215
uncharacterized protein MONBRDRAFT_32693	43	42	36	53	38	212
DNAdirected RNA polymerase, beta subunit	39	45	26	71	30	211
phosphatidylinositol kinase- protein kinase tor1	61	40	30	48	32	211
carbon-nitrogen hydrolase family protein	67	34	24	65	20	210
photosystem I P700 apoprotein A2 (chloroplast)	29	12	23	139	4	207
ATP-dependent RNA helicase SUB2	49	37	33	52	35	206
uncharacterized protein HETIRDRAFT_381185	75	23	24	64	20	206
NADH-quinone oxidoreductase subunit D	64	32	17	42	50	205
ABC transporter family protein	146	24	23	6	5	204
RNB-like protein	37	35	17	67	46	202
EF-Tu/IF-2/RF-3 family GTPase, partial	7	0	0	157	37	201
NADPH--cytochrome P450 reductase	94	40	37	18	12	201
ribosomal protein S7 domain-containing protein	16	54	43	61	27	201
C1 family peptidase	11	86	53	27	23	200
Piwi domain-containing protein	67	28	13	56	36	200
GTP-binding protein YPT5	117	20	27	22	13	199
uncharacterized protein CcaverHIS019_0101730	80	47	19	28	25	199
uncharacterized protein PV09_05043	44	40	29	43	43	199
exoribonuclease 1	69	66	26	22	15	198
uncharacterized protein DICPUDRAFT_45258	67	36	18	52	25	198
uncharacterized protein OGAPHI_006213	32	23	25	77	40	197
40S ribosomal protein S26	13	72	57	28	24	194
uncharacterized protein TRIATDRAFT_154439	69	31	21	39	34	194
ATP-dependent Clp protease ATP-binding subunit ClpA	71	18	31	49	24	193
glycine/serine hydroxymethyltransferase	73	43	54	12	11	193
mitochondrial processing peptidase	61	43	51	25	13	193
uncharacterized protein SmJEL517_g03979	87	20	44	28	14	193
WD40 repeat-containing protein	32	39	17	67	38	193
hypothetical protein GUITHDRAFT_159666	50	45	23	56	18	192
eukaryotic elongation factor 5A hypusine, DNA-binding OB fold domain-containing protein	48	33	40	29	40	190
glycoside hydrolase family 9 protein	84	22	29	47	7	189
photosystem II CP47 chlorophyll apoprotein (chloroplast)	31	18	10	122	8	189
glucose-6-phosphate 1-dehydrogenase	57	23	23	48	37	188
Mo25-like protein	42	45	71	16	13	187
putative phosphopyruvate hydratase ENO1	19	37	15	67	48	186
general substrate transporter	40	79	16	32	18	185
Phosphoprotein phosphatase	69	32	31	31	22	185
thioredoxin 1	23	37	54	37	33	184
uncharacterized protein K450DRAFT_222684	65	27	25	48	19	184
26S proteasome non-ATPase regulatory subunit 2	50	35	32	37	29	183
heat shock protein Hsp90, cytosolic protein	40	65	41	14	23	183
NADPH-dependent cytochrome P450 oxidoreductase	79	39	30	23	12	183
RNA helicase-domain-containing protein	74	25	21	34	29	183
uncharacterized protein CANTEDRAFT_102321	71	22	23	41	26	183
ATPase	64	21	27	51	18	181
branched-chain amino acid aminotransferase	76	25	21	41	18	181
cytochrome c oxidase subunit I	10	5	7	118	41	181
40S ribosomal protein S14	58	24	39	30	28	179
60S ribosomal protein L7	26	13	7	78	55	179
Translation initiation factor	118	13	8	26	14	179
uncharacterized protein THITE_2116933	34	45	28	32	40	179
tyrosine protein kinase, putative	32	33	21	57	35	178
hypothetical protein EMIHUDRAFT_60463, partial	67	29	37	24	20	177
glycosyltransferase family 48 protein	68	20	7	77	4	176
GTP-binding nuclear protein gsp1 ran	77	27	41	17	14	176
methylmalonatesemialdehyde dehydrogenase (acylating), putative	23	49	44	39	21	176
MULTISPECIES: TCP-1/cpn60 chaperonin family protein, partial	41	35	43	30	27	176
hypothetical protein NCAS_0I03050	41	31	38	34	30	174
30S ribosomal protein S12	55	31	17	46	24	173
acetyl-CoA carboxylase	140	6	9	13	5	173
cell differentiation family, Rcd1-like-domain-containing protein	32	46	32	40	23	173
NUC091 domain-containing protein	13	4	2	105	49	173
peptidylprolyl isomerase	38	29	20	53	33	173
photosystem II CP43 chlorophyll apoprotein (chloroplast)	53	15	26	74	5	173
UFD4	95	20	19	23	16	173
phenylalanyl-tRNA synthetase	57	26	18	54	17	172
severin	65	29	20	36	21	171
uncharacterized protein BATDEDRAFT_567, partial	57	21	23	41	28	170
uncharacterized protein SmJEL517_g05103	61	30	20	38	21	170
endopeptidase	51	39	39	19	21	169
protein kinase domain containing protein	28	40	31	44	26	169
rab GDP-dissociation inhibitor	58	28	28	31	24	169
heat shock protein 90	62	31	38	27	10	168
nucleoside-diphosphate kinase	65	22	26	30	25	168
60S ribosomal protein-like protein L30	62	24	14	44	23	167
GDP dissociation inhibitor	42	36	45	24	20	167
MULTISPECIES: GH1 family beta-glucosidase	69	30	39	19	10	167
hypothetical protein GUITHDRAFT_160011	58	33	65	5	5	166
LISK family protein kinase	55	44	35	15	17	166
cell division control protein 42	34	24	36	30	40	164
MULTISPECIES: asparagine synthase B	41	32	9	61	21	164
S4 domain-containing protein, partial	34	46	22	34	28	164
Ubiquitin-conjugating enzyme E2 1	16	40	35	29	44	164
atypical/PIKK/FRAP protein kinase	33	47	25	48	10	163
beta-ketoacyl-ACP synthase II	95	24	11	18	15	163
mo25 protein	113	15	26	7	2	163
nuclear export factor CRM1, partial	84	7	24	28	20	163
uncharacterized protein GLOTRDRAFT_102423	0	0	0	133	30	163
60S ribosomal protein L7, partial	26	16	7	79	34	162
hypothetical protein PHYBLDRAFT_75371	32	51	22	35	22	162
synaptobrevin	63	7	7	58	27	162
uncharacterized protein G4B84_009904	55	12	19	48	28	162
uncharacterized protein SmJEL517_g01401, partial	0	0	0	100	61	161
40S ribosomal protein S6	82	16	12	23	27	160
calcium-transporting ATPase, endoplasimc reticulum type	66	34	28	11	21	160
F0F1 ATP synthase subunit A	3	3	3	88	63	160
Ras-like protein Rab-11B	57	31	17	28	27	160
60S ribosomal protein L18	17	51	51	18	22	159
uncharacterized protein O0I10_004173	33	25	25	48	28	159
actin, putative	26	2	2	79	49	158
hnRNPL/PTB/hephaestus splicing factor subfamily protein	45	44	19	34	16	158
hypothetical protein PHYBLDRAFT_155444	68	15	9	44	22	158
KH domain-containing protein, partial	88	21	13	17	19	158
proteasome 26S subunit	76	25	20	14	23	158
translation initiation factor eIF-5A	21	24	26	39	48	158
copper/zinc binding superoxide dismutase	37	31	36	29	24	157
polyadenylate binding protein	14	24	34	55	30	157
CMGC/MAPK protein kinase	62	28	14	36	16	156
oxidoreductase	48	22	20	37	29	156
acetyl CoA carboxylase	142	2	5	6	0	155
chorismate synthase	57	15	20	36	27	155
CoA-acylating methylmalonate-semialdehyde dehydrogenase	35	36	25	38	21	155
glutathione S-transferase	16	26	43	42	28	155
hypothetical protein PHYBLDRAFT_89118, partial	25	41	24	38	27	155
hypothetical protein DDB_G0283539	91	13	27	12	11	154
P-loop containing nucleoside triphosphate hydrolase protein, partial	81	10	20	32	11	154
calcium-transporting ATPase PAT1	60	24	13	43	13	153
cathepsin L2	69	10	23	34	17	153
Oligosaccharyl transferase STT3 subunit-domain-containing protein	50	26	10	47	20	153
CAAX prenyl protease 1	40	41	27	23	21	152
hypothetical protein POSPLADRAFT_1053638	54	21	24	34	18	151
Adaptor protein 2 beta subunit 1	57	21	22	39	11	150
ATP synthase F0 subunit a (mitochondrion)	32	13	24	60	21	150
myosin light chain kinase	47	26	16	42	19	150
phospholipid-translocating P-type ATPase	50	22	15	45	18	150
uncharacterized protein MIND_00735400	17	43	31	34	25	150
uncharacterized protein PtA15_8A308	2	9	2	100	37	150
dynamin 1	56	21	24	23	25	149
NADP-dependent succinate-semialdehyde dehydrogenase	37	31	17	32	32	149
riboflavin synthase domain-like protein	104	13	20	2	10	149
uncharacterized protein DICSQDRAFT_54562	47	42	56	2	2	149
thyroid hormone receptor interactor 12	44	28	27	33	16	148
conserved hypothetical protein	18	11	12	82	24	147
glucose-regulated protein 94	40	14	16	50	27	147
hypothetical protein SAMD00019534_031900	31	24	19	40	33	147
class V myosin (Myo4), partial	52	11	13	52	18	146
kinase-like domain-containing protein, partial	27	43	18	37	21	146
uncharacterized protein F5B22DRAFT_55790	85	17	21	12	11	146
beta-ketoacyl-acyl-carrier-protein synthase II	52	26	17	40	10	145
peptidyl-prolyl cis-trans isomerase	21	15	9	64	36	145
phosphoglycerate kinase	36	21	44	28	16	145
plasma membrane H+-transporting ATPase	60	28	22	18	17	145
TKL protein kinase	55	28	24	21	17	145
40s ribosomal protein s5-1	14	56	12	35	27	144
DsbA family oxidoreductase	74	21	28	11	10	144
eukaryotic translation initiation factor 4A isoform 1B	8	14	4	78	40	144
hypothetical protein GUITHDRAFT_101689	36	28	21	31	28	144
MULTISPECIES: cytochrome c oxidase subunit I	0	0	0	88	56	144
Phosphoglucose isomerase (PGI)	49	22	13	39	20	143
protein arginine N-methyltransferase, putative	34	15	19	44	31	143
uncharacterized protein F5J12DRAFT_903089	102	9	17	7	8	143
cytochrome c oxidase subunit I (mitochondrion)	1	5	1	103	32	142
elongation factor 2	4	11	6	78	43	142
ferredoxin thioreductase subunit b (chloroplast)	35	26	62	19	0	142
dual-specificity tyrosine-(Y)-phosphorylation regulated kinase 1B	38	37	30	20	16	141
60S ribosomal protein, putative	39	34	26	21	20	140
actinrelated protein 2, putative	47	23	16	40	14	140
calcium-translocating p-type pmca-type	38	26	25	28	23	140
putative TCP1-component of chaperonin-containing T-complex	81	15	19	12	13	140
thioredoxin-like protein	72	17	18	20	13	140
60S ribosomal protein L11	26	23	27	34	29	139
actin 1	7	21	14	73	24	139
Sec63 Brl domain-containing protein	39	18	39	31	12	139
WD40 repeat-like protein	28	32	17	44	18	139
DNA-directed RNA polymerase III subunit RPC2	19	12	18	52	37	138
hypothetical protein AURANDRAFT_53176, partial	71	30	23	6	8	138
uncharacterized protein MELLADRAFT_46086, partial	49	32	40	6	11	138
protein disulfide-isomerase domain	45	19	26	24	23	137
uncharacterized protein BT62DRAFT_938309	38	32	18	37	12	137
uncharacterized protein GSPATT00001260001	58	16	30	19	14	137
Zn(2)-C6 fungal-type domain-containing protein	38	24	29	24	22	137
DEAD/DEAH box helicase	49	16	17	35	19	136
Hsp90 protein	49	25	21	23	18	136
hypothetical protein AGABI2DRAFT_77005	32	32	32	18	22	136
hypothetical protein GUITHDRAFT_95571	13	33	79	8	3	136
Inos-1-P-synth domain-containing protein	35	55	44	2	0	136
ribosomal protein L1 (chloroplast)	69	18	30	11	8	136
uL10 family ribosomal protein	9	16	5	71	35	136
clathrin	28	24	17	34	32	135
photosystem I core protein PsaB	20	2	4	99	10	135
phycobilisome linker polypeptide (chloroplast)	9	0	0	119	7	135
60S acidic ribosomal protein P2, partial	8	30	19	50	27	134
glutamate decarboxylase	45	37	26	15	11	134
hypothetical protein POSPLADRAFT_1182988	87	21	15	9	2	134
protein disulfide isomerase	81	12	11	17	13	134
protein kinase domain protein	53	20	10	39	12	134
uncharacterized protein PFICI_07482	48	14	13	36	23	134
calreticulin-like protein, partial	89	7	23	9	5	133
uncharacterized protein MONBRDRAFT_13270, partial	95	16	15	3	4	133
ATP-binding protein, partial	16	32	52	18	14	132
Beta-glucosidase cel3A	0	0	0	118	14	132
eukaryotic translation initiation factor 3 subunit E	24	22	19	36	31	132
helicase domain-containing protein	42	22	14	41	13	132
NADH-quinone oxidoreductase subunit A	4	12	6	73	37	132
DNA-directed RNA polymerase III complex subunit Rpc2	24	9	5	61	32	131
Phenylalanyl-tRNA synthetase subunit beta	50	14	14	35	18	131
phycoerythrin subunit a (chloroplast)	5	2	0	121	3	131
polyadenylate-binding protein, putative	3	24	29	36	39	131
quinone oxidoreductase family protein	70	20	25	10	6	131
SNF2 family ATP-dependent chromatin-remodeling factor snf21	23	28	8	51	21	131
uncharacterized protein PC9H_007108	75	17	11	23	5	131
glutamate-5-semialdehyde dehydrogenase	22	12	16	52	28	130
uncharacterized protein M406DRAFT_354923	23	22	12	42	31	130
Alpha/Beta hydrolase protein	28	31	41	17	12	129
Eukaryotic translation initiation factor eIF-5A	20	25	25	34	25	129
plasma membrane proteolipid 3	0	30	1	51	47	129
uncharacterized protein B0T26DRAFT_596863, partial	33	13	14	55	14	129
WD40 repeat domain-containing protein, partial	4	0	0	87	38	129
40S ribosomal protein S13	49	20	29	11	19	128
hypothetical protein AURANDRAFT_20758, partial	57	24	39	2	6	128
MULTISPECIES: amidase	49	23	30	18	8	128
uncharacterized protein GSPATT00038399001	56	35	23	8	6	128
beta-galactosidase	73	22	11	9	12	127
H+-transporting two-sector ATPase	45	32	14	23	13	127
MFS general substrate transporter	18	9	14	70	16	127
uncharacterized protein K450DRAFT_229584	30	26	12	38	21	127
cathepsin B family cysteine peptidase, partial	83	13	15	15	0	126
dynamin 2	52	27	13	18	16	126
hypothetical protein GLOIN_2v1633885	63	25	8	15	15	126
hypothetical protein, variant 6	44	14	6	46	16	126
importin subunit beta-3	49	16	17	31	13	126
GTP-binding protein RAB5	72	12	14	21	6	125
uncharacterized protein SPPG_02746	23	33	22	32	15	125
XRN 5'-3' exonuclease N-terminus-domain-containing protein	47	24	13	31	10	125
DEAD box ATP-dependent RNA helicase family member protein	34	28	23	20	19	124
V-type proton ATPase subunit B	43	32	20	17	12	124
alpha/beta-hydrolase	34	21	12	47	9	123
elongation factor Tu	50	6	4	45	18	123
hypothetical protein AGABI2DRAFT_133794	50	16	11	28	18	123
hypothetical protein GUITHDRAFT_159531	12	38	34	24	15	123
mitogen activated protein kinase-like protein	46	24	24	19	10	123
ribosomal S13/S15 N-terminal domain-containing protein	52	22	23	14	12	123
uncharacterized protein ALTATR162_LOCUS3125	67	17	11	17	11	123
uncharacterized protein RHOBADRAFT_55818	85	11	25	0	2	123
uncharacterized protein SmJEL517_g02661	55	28	12	19	9	123
uncharacterized protein SmJEL517_g03268	44	25	22	13	19	123
Vacuolar ATP synthase subunit B	44	19	18	22	20	123
protein arginine N-methyltransferase 5, partial	36	8	16	40	22	122
t-complex protein 1	26	34	17	33	12	122
uncharacterized protein BCR37DRAFT_376397	28	27	19	28	20	122
uncharacterized protein K452DRAFT_330221	31	8	14	23	46	122
carbamoyl phosphate synthase small subunit (chloroplast)	15	13	18	56	19	121
DnaJ domain-containing protein, partial	39	20	18	23	21	121
dynein heavy chain and region D6 of dynein motor-domain-containing protein	0	0	0	65	56	121
atp-dependent rna helicase dhh1	55	20	17	22	6	120
large subunit ribosomal protein L30e, cytoplasmic	12	35	14	32	27	120
reverse transcriptase domain-containing protein	0	0	0	85	35	120
AMP-binding protein	61	20	19	9	10	119
CRM1 C terminal-domain-containing protein	28	29	18	32	12	119
EF-hand domain-containing protein, partial	11	6	5	77	20	119
proteasome subunit alpha type-3	78	12	15	7	7	119
translation initiation factor IF-3	17	27	22	39	14	119
chaperonin-containing T-complex alpha subunit TCP1	41	15	21	26	15	118
dynamin like protein	53	24	15	13	13	118
myosin II heavy chain	38	19	20	30	11	118
proton-conducting transporter membrane subunit, partial	3	0	0	77	38	118
uncharacterized protein PHACADRAFT_246819	49	16	13	27	13	118
acyl-CoA dehydrogenase	44	14	21	21	17	117
uncharacterized protein MONBRDRAFT_33241	49	13	18	30	7	117
hypothetical protein AGABI2DRAFT_151460	48	20	9	24	15	116
uncharacterized protein C9374_005337	66	16	19	8	7	116
uncharacterized protein F5J12DRAFT_923070	31	26	12	31	16	116
antibiotic transport system ATP-binding protein, partial	47	19	16	30	3	115
atp-binding cassette superfamily	30	15	23	34	13	115
calcium-translocating P-type ATPase	58	17	14	18	8	115
cytochrome c oxidase subunit II (mitochondrion)	3	6	6	70	30	115
uncharacterized protein MONBRDRAFT_21523	74	4	14	12	11	115
uncharacterized protein SPPG_06462	87	4	21	2	1	115
catalase, partial	47	25	21	13	8	114
hypothetical protein CAOG_08933	29	22	23	25	15	114
isocitrate dehydrogenase NADP-dependent	37	16	32	18	11	114
uncharacterized protein ACA1_198710	87	7	6	10	4	114
hypothetical protein PHYSODRAFT_252786	11	16	5	48	33	113
nuclear elongation and deformation protein 1	46	22	26	11	8	113
STE/STE11 protein kinase	34	21	21	25	12	113
uncharacterized protein C9374_013528	57	18	9	15	14	113
uncharacterized protein FDP41_007688	11	37	23	27	15	113
uncharacterized protein GSPATT00016635001	42	30	22	12	7	113
30S ribosomal protein S11, partial	21	25	23	24	19	112
CNPV087 putative glutathione peroxidase	42	12	30	22	6	112
DNA-directed RNA polymerase II subunit RPB2	22	25	17	30	18	112
kinase-like protein, partial	20	25	15	28	24	112
Na+/H+ antiporter	17	27	15	28	25	112
UDP-N-acetylglucosamine-peptide N-acetylglucosaminyltransferase, putative	32	11	26	19	24	112
uncharacterized protein N7469_005286	32	14	11	26	29	112
thioredoxin, variant	11	32	30	19	19	111
uncharacterized protein C5L36_0A12010	41	40	17	8	5	111
50S ribosomal protein L3, partial	4	13	9	57	27	110
H3.3	6	22	38	27	17	110
hypothetical protein FPOAC1_008693	18	29	23	27	13	110
uncharacterized protein GLOTRDRAFT_26264, partial	45	18	21	19	7	110
cytochrome-b5 reductase	47	15	17	15	15	109
F0F1 ATP synthase subunit alpha	9	5	1	78	16	109
uncharacterized protein FOBCDRAFT_135893	18	20	20	27	24	109
uncharacterized protein SmJEL517_g05252	51	16	9	19	14	109
uncharacterized protein SPPG_00137	16	42	26	13	12	109
cathepsin L, putative	47	13	10	25	13	108
hypothetical protein GUITHDRAFT_67343	52	22	14	15	5	108
SNF2 family N-terminal domain-containing protein	38	19	12	23	16	108
uncharacterized protein L969DRAFT_83780	20	22	18	41	7	108
acetate--CoA ligase	30	31	18	17	11	107
AGC/MAST/MAST protein kinase	37	20	9	28	13	107
Mark1 protein	27	10	17	36	17	107
NADH-quinone oxidoreductase subunit L	5	1	0	58	43	107
sarco/endoplasmic reticulum calcium transporting ATPase	25	25	15	25	17	107
tRNA synthetases class I-domain-containing protein	27	20	23	27	10	107
uncharacterized protein ALTATR162_LOCUS12007	19	29	13	23	23	107
aquaporin Z	79	4	7	9	7	106
aspartic peptidase A1	16	27	19	35	9	106
30S ribosomal protein S3	29	8	17	40	11	105
cellobiohydrolaseI	0	0	0	96	9	105
DEAD-domain-containing protein	26	26	10	31	12	105
glutamine synthetase-like protein	15	26	59	4	1	105
TIP120-domain-containing protein	39	20	10	25	11	105
uL30 family ribosomal protein, partial	23	10	7	37	28	105
integral membrane protein DUF106-domain-containing protein	4	26	15	35	24	104
NADH dehydrogenase (quinone) subunit D	55	10	4	24	11	104
ADP-ribosylation factor 1, partial	15	8	15	41	24	103
component of cytosolic 80S ribosome and 60S large subunit	7	22	23	23	28	103
elongation factor 1-alpha	8	0	2	36	57	103
hypothetical protein SAMD00019534_009350	34	31	18	9	11	103
phycobilisome rod-core linker polypeptide (chloroplast)	8	2	0	89	4	103
phycocyanin alpha subunit (chloroplast)	0	3	0	97	3	103
uncharacterized protein E1B28_008848	30	17	11	30	15	103
uncharacterized protein FOMMEDRAFT_133373	28	18	21	22	14	103
uncharacterized protein LACBIDRAFT_294356	44	15	13	15	16	103
Chorismate synthase	61	12	10	9	10	102
nucleolar GTP-binding protein	21	5	4	54	18	102
oxygen-dependent coproporphyrinogen oxidase	31	20	26	11	14	102
SNF2 family Nterminal domain containing protein	35	17	13	29	8	102
uncharacterized protein BT62DRAFT_978558	0	0	0	85	17	102
uncharacterized protein F5J12DRAFT_845193	38	17	8	23	16	102
cytochrome b6/f complex subunit IV (chloroplast)	20	35	44	2	0	101
ubiquitin-60S ribosomal protein L40	55	18	8	15	5	101
Ufd4 protein	28	23	8	31	11	101
acetyl-CoA synthetase-like protein	73	9	8	9	1	100
uncharacterized protein EV422DRAFT_537161	16	28	25	19	12	100
BTB/POZ-like protein	0	0	0	96	3	99
ribulose-1,5-bisphosphate carboxylase/oxygenase small subunit (chloroplast)	0	3	1	88	7	99
uncharacterized protein AUEXF2481DRAFT_464169	21	19	12	27	20	99
uncharacterized protein BJ171DRAFT_511326	33	21	25	13	7	99
uncharacterized protein LCP9604111_803	26	21	15	23	14	99
alcohol oxidase	0	0	1	75	22	98
guanine nucleotide-exchange protein	27	13	15	31	12	98
hypothetical protein GUITHDRAFT_163787	57	13	10	6	12	98
RNA-binding region RNP-1 domain-containing protein	5	43	9	28	13	98
coatomer	37	17	8	27	8	97
DNA-directed RNA polymerase II subunit RPB1	30	17	14	27	9	97
hypothetical protein GUITHDRAFT_71963	40	16	10	19	12	97
photosystem I core protein PsaB, partial	7	1	3	75	11	97
protein arginine N-methyltransferase	32	23	19	14	9	97
translation elongation factor EF-1 subunit alpha	31	14	3	30	19	97
uncharacterized protein PAN0_014c4882	29	29	36	1	2	97
14-3-3 family protein epsilon	41	11	12	19	13	96
40S ribosomal protein S11	12	23	18	14	29	96
aspartic peptidase domain-containing protein	20	14	18	37	7	96
cytochrome oxidase subunit 1 (mitochondrion)	1	1	2	75	17	96
ferritin, partial	13	7	22	35	19	96
hypothetical protein PHYBLDRAFT_123428	37	18	11	13	17	96
hypothetical protein PHYSODRAFT_340380	18	15	6	23	34	96
uncharacterized protein SmJEL517_g00318	48	16	3	18	11	96
actin-like protein 2	35	25	10	13	12	95
AMP deaminase	44	11	9	25	6	95
ATP-citrate synthase	54	13	20	2	6	95
hypothetical protein GUITHDRAFT_67884	46	19	10	16	4	95
MULTISPECIES: oxidoreductase	21	13	13	27	21	95
ribosomal protein L22/L17	19	34	20	10	12	95
tubulin beta chain, putative	26	8	4	39	18	95
uncharacterized protein BATDEDRAFT_16026	26	11	9	34	15	95
uncharacterized protein BJ171DRAFT_405830, partial	6	17	18	28	26	95
uncharacterized protein POJ06DRAFT_89990	8	8	8	41	30	95
calreticulin	42	5	11	28	8	94
glyceraldehyd-3-phosphate dehydrogenase	6	20	48	9	11	94
putative cation-transporting ATPase	39	14	14	11	16	94
R-SNARE protein	32	8	11	25	18	94
uncharacterized protein HETIRDRAFT_377595	29	21	15	14	15	94
uncharacterized protein MELLADRAFT_47293, partial	50	12	6	20	6	94
AAA ATPase	38	11	10	27	7	93
acyl-CoA oxidase isoform 2	36	14	12	14	17	93
ATP-dependent RNA helicase eIF4A	18	17	7	34	17	93
hypothetical protein DDB_G0293072	51	10	29	0	3	93
myosin heavy chain	40	9	4	29	11	93
protein disulfide-isomerase	15	31	27	11	9	93
S60 ribosomal protein L7	10	12	6	44	21	93
uncharacterized protein BJ171DRAFT_503834	3	35	15	18	22	93
uncharacterized protein MYCFIDRAFT_210905	23	28	18	14	10	93
uncharacterized protein MYCFIDRAFT_72600	11	21	27	20	14	93
40S ribosomal protein S3a/S1	23	17	7	33	12	92
glutamate synthase large subunit	51	4	3	21	13	92
large subunit ribosomal protein L18e, cytoplasmic	12	23	30	19	8	92
uncharacterized protein BJ171DRAFT_221525	43	16	4	15	14	92
14-3-3 protein, partial	21	13	12	35	10	91
hypothetical protein EMIHUDRAFT_450596	38	7	4	35	7	91
methionyl-tRNA synthetase isoform 1	28	15	17	19	12	91
papain family cysteine protease	30	24	23	8	6	91
RNA polymerase II core subunit	41	18	10	12	10	91
ATP synthase F0 subunit 6 (mitochondrion)	21	8	7	47	7	90
hypothetical protein GUITHDRAFT_87243	51	6	4	24	5	90
hypothetical protein PPTG_15525	30	9	1	27	23	90
NAD-dependent aldehyde dehydrogenase	31	15	11	22	11	90
uncharacterized protein DICPUDRAFT_151373	61	9	11	3	6	90
uncharacterized protein GSPATT00009149001	62	11	6	9	2	90
uncharacterized protein PTSG_08854	42	9	7	16	16	90
5'-AMP-activated protein kinase catalytic subunit alpha-2	17	21	19	19	13	89
hypothetical protein GUITHDRAFT_157624	28	32	23	2	4	89
hypothetical protein H257_04074	28	10	19	14	18	89
long-chain fatty acid--CoA ligase	43	23	16	4	3	89
Serine/threonine-protein kinase tor2	37	18	11	20	3	89
uncharacterized protein MONBRDRAFT_18115	37	6	7	21	18	89
uncharacterized protein Z519_00123	39	12	10	21	7	89
villin-1	27	9	9	25	19	89
60S ribosomal protein L16	17	22	10	22	17	88
component of IIS longevity pathway SMK-1-domain-containing protein	17	22	14	18	17	88
hypothetical protein AGABI2DRAFT_64355, partial	27	12	8	25	16	88
hypothetical protein GLOIN_2v1884825	10	18	17	21	22	88
hypothetical protein GUITHDRAFT_159164	28	17	18	14	11	88
hypothetical protein PHYBLDRAFT_130553	10	33	19	19	7	88
MAP kinase kinase kinase ste11	49	14	18	4	3	88
Ribophorin I	53	15	11	6	3	88
T-complex protein 1	28	17	13	17	13	88
transport protein Sec61 alpha subunit, putative	17	27	13	23	8	88
uncharacterized protein KVR01_004213	35	12	14	20	7	88
Actin-like protein	24	13	5	28	17	87
DASH family cryptochrome	47	16	12	9	3	87
serine hydroxymethyltransferase Shm2	39	16	27	2	3	87
ubiquitin-protein ligase E3, partial	28	19	13	12	15	87
60S ribosomal protein L38	53	13	11	4	5	86
Calreticulin-domain-containing protein	29	7	0	33	17	86
CMGC/MAPK/P38 protein kinase	26	24	19	8	9	86
dynein	0	0	0	55	31	86
hypothetical protein EMIHUDRAFT_48267, partial	29	18	13	22	4	86
hypothetical protein SPRG_15352	5	23	13	29	16	86
peptidase family M48-domain-containing protein	19	17	14	22	14	86
ubiquitin	3	1	2	57	23	86
uncharacterized protein PGTG_22199	23	13	9	32	9	86
60S ribosomal protein L18A, partial	17	17	9	25	17	85
CAMK/CAMKL/MARK protein kinase	7	24	28	14	12	85
eukaryotic translation initiation factor 3	19	20	16	17	13	85
FKBP-type peptidylprolyl cis-trans isomerase	42	8	8	15	12	85
HSP90-like protein, related	58	9	15	0	3	85
proteasome subunit alpha type protein	30	22	19	9	5	85
small GTP-binding protein sar1, putative	8	15	13	33	16	85
staphylococcal nuclease domain-containing protein 1-like isoform x1	33	13	1	19	19	85
uncharacterized protein K437DRAFT_229700	20	18	26	16	5	85
uncharacterized protein MGL_1733	37	17	19	9	3	85
acyl-CoA oxidase	33	7	19	18	7	84
polyketide synthetase	23	5	11	27	18	84
proteasome core particle subunit alpha 7	55	10	7	5	7	84
cellobiohydrolaseII	0	0	0	73	10	83
glycosyltransferase family 2 protein	6	1	2	66	8	83
GP-PDE domain-containing protein	32	6	6	34	5	83
MFS monosaccharide transporter	7	24	1	47	4	83
uncharacterized protein AGABI1DRAFT_116269, partial	27	7	18	18	13	83
uncharacterized protein BX664DRAFT_25625	21	9	5	40	8	83
uncharacterized protein MONBRDRAFT_19302	33	5	1	25	19	83
actin-3	4	4	6	38	30	82
Major facilitator-type transporter ecdD	21	20	11	25	5	82
protein arginine methyltransferase	28	11	6	27	10	82
Serine/Threonine kinase domain protein	36	29	9	5	3	82
uncharacterized protein EV420DRAFT_1261089	0	0	0	70	12	82
vacuolar ATP synthase subunit b, putative	39	17	11	11	4	82
glycoside hydrolase	17	4	3	48	9	81
glycosyltransferase family 35 protein	22	10	17	27	5	81
hypothetical protein (chloroplast)	23	12	19	27	0	81
hypothetical protein AGABI2DRAFT_190041	21	19	15	13	13	81
translation initiation factor eIF-3 subunit 6	19	10	8	28	16	81
ubiquitin-domain-containing protein	51	7	5	7	11	81
uncharacterized protein PFL1_04046	27	19	13	13	9	81
uncharacterized protein SKDI_16G1450	16	27	13	14	11	81
40S ribosomal protein S6-B	4	11	13	30	22	80
50S ribosomal protein L22	10	23	12	12	23	80
adenosine monophosphate deaminase 2 (isoform L) isoform 3	26	17	16	8	13	80
Camk2b protein	22	14	9	25	10	80
cbb3-type cytochrome c oxidase subunit I	0	0	0	38	42	80
EF hand associated-domain-containing protein	18	8	5	28	21	80
helicase conserved Cterminal domain containing protein	29	17	7	11	16	80
oligosaccharyl transferase	21	15	13	15	16	80
putative ubiquitin-conjugating enzyme E2 W	21	20	5	31	3	80
rab GTPase activator	33	7	8	21	11	80
RuBisCO large subunit C-terminal-like domain-containing protein, partial	23	2	18	34	3	80
AGC/Akt protein kinase	41	5	10	16	7	79
cell differentiation proteins Rcd1-like protein	30	13	13	7	16	79
hypothetical protein AURANDRAFT_25773, partial	1	0	2	47	29	79
hypothetical protein SAMD00019534_085790	8	25	9	23	14	79
isocitrate dehydrogenase	57	11	7	3	1	79
ribosomal protein S13p/S18e, putative	3	19	19	22	16	79
uncharacterized protein Kpol_530p51	18	16	25	10	10	79
AGC/MAST protein kinase	16	26	26	8	2	78
allophycocyanin beta subunit (chloroplast)	0	0	0	77	1	78
citrate synthase-like protein	39	9	13	14	3	78
hypothetical protein BCR41DRAFT_395054	18	12	9	26	13	78
lactate/malate dehydrogenase	44	11	23	0	0	78
leucyl aminopeptidase family protein	23	12	8	27	8	78
mitogen-activated protein kinase HOG1	26	12	16	10	14	78
nuclear and cytoplasmic polyadenylated RNA-binding protein pub1	31	11	12	14	10	78
processing peptidase beta subunit	36	18	17	4	3	78
ribosomal protein l6	7	25	14	14	18	78
uncharacterized protein BAUCODRAFT_32061	19	8	9	33	9	78
uncharacterized protein COCSADRAFT_92320	21	6	13	19	19	78
actin related protein 2	47	4	7	11	8	77
acyl carrier protein	53	6	8	4	6	77
adenylate kinase	36	20	15	5	1	77
cyclophilin B precursor	56	6	8	5	2	77
hypothetical protein CAOG_09049	33	15	19	7	3	77
likely protein kinase	3	8	12	34	20	77
peptidylprolyl isomerase, partial	8	12	5	31	21	77
SDR family NAD(P)-dependent oxidoreductase	26	14	14	9	14	77
uncharacterized protein BC939DRAFT_505448	29	14	11	18	5	77
uncharacterized protein SmJEL517_g01778	16	14	4	24	19	77
60S ribosomal protein L15	19	12	14	20	11	76
Cullin-domain-containing protein	9	21	11	28	7	76
Histone H3	19	8	23	13	13	76
initiation factor protein 1, isoform b, confirmed by transcript evidence	16	12	6	27	15	76
uncharacterized protein BDV27DRAFT_84787	24	9	16	13	14	76
uncharacterized protein K450DRAFT_259839	20	15	4	24	13	76
uncharacterized protein N7532_007605	0	1	0	60	15	76
uncharacterized protein PHACADRAFT_249479	15	21	11	17	12	76
60S ribosomal protein L6	4	11	8	26	26	75
acetyl-CoA acetyltransferase	40	17	6	10	2	75
aldehyde dehydrogenase (NAD(P)(+)) ald5	17	17	19	13	9	75
cytochrome c oxidase subunit 3, partial	0	0	0	32	43	75
histone H2B family protein	0	0	0	72	3	75
HSP90-domain-containing protein	29	8	11	24	3	75
hypothetical protein GUITHDRAFT_79541	34	10	15	7	9	75
hypothetical protein, variant 1	12	22	21	13	7	75
phycocyanin beta subunit (chloroplast)	10	0	0	52	13	75
Rho GTPase	30	8	12	17	8	75
ribosomal protein S19-domain-containing protein	35	12	15	6	7	75
rRNA 2'-O-methyltransferase fibrillarin-like	16	12	15	20	12	75
serine carboxypeptidase	24	24	20	5	2	75
acid protease	0	0	0	68	6	74
histone H2A	8	3	3	51	9	74
hypothetical protein POSPLADRAFT_1066716	9	22	21	12	10	74
hypothetical protein POSPLADRAFT_1141663	32	9	20	8	5	74
photosystem II D2 protein (photosystem q(a) protein)	20	6	0	33	15	74
PremRNA processing splicing factor 8, putative	35	10	4	19	6	74
superoxide dismutase	10	10	18	15	21	74
uncharacterized protein BJ171DRAFT_462045	36	10	7	9	12	74
uncharacterized protein D7B24_001692	0	0	0	72	2	74
uncharacterized protein DL89DRAFT_274009	10	25	11	20	8	74
uncharacterized protein MELLADRAFT_73862	24	14	11	15	10	74
50S ribosomal protein L13, partial	9	20	9	20	15	73
Beta-ketoacyl-acyl carrier protein synthase III (chloroplast)	29	5	13	18	8	73
Ca2+ transporting ATPase, sarcoplasmic/endoplasmic reticulum	26	15	15	9	8	73
cytochrome c oxidase subunit III (mitochondrion)	2	2	2	55	12	73
long-chain-fatty-acid--CoA ligase FadD	43	10	9	7	4	73
oligosaccharyl transferase, STT3 subunit	18	10	10	21	14	73
putative chaperonin-containing T-complex alpha subunit TCP1	24	17	6	19	7	73
Sec63-domain-containing protein	21	11	15	24	2	73
serine hydroxymethyltransferase, mitochondrial	46	8	11	1	7	73
TATA-box-binding protein	17	12	8	20	16	73
uncharacterized protein MELLADRAFT_48133	34	8	13	16	2	73
Cu,Zn superoxide dismutase	16	19	23	9	5	72
DNA-directed RNA polymerase	9	6	4	36	17	72
hypothetical protein CAOG_09096	24	17	16	8	7	72
uncharacterized protein ASPWEDRAFT_60368	16	20	22	7	7	72
uncharacterized protein BJ171DRAFT_488056	26	16	23	1	6	72
uncharacterized protein GSPATT00005008001	33	7	8	7	17	72
uncharacterized protein PTSG_00038	19	21	13	7	12	72
ADP-ribosylation factor Arf1	6	8	2	32	23	71
cytochrome c oxidase subunit partial	7	6	4	49	5	71
hypothetical protein SARC_03846	21	12	8	12	18	71
hypothetical protein SNOG_10279	17	13	16	17	8	71
peptidase M24, structural domain-containing protein	37	10	2	18	4	71
putative Serine/threonine-protein kinase	23	14	10	12	12	71
ribulose-1,5-bisphosphate carboxylase/oxygenase large subunit (plastid)	10	4	3	48	6	71
tubulin alpha chain	20	6	4	36	5	71
ubiquitin, putative	20	13	16	15	7	71
uncharacterized protein E1B28_004506	19	22	16	6	8	71
uncharacterized protein Kpol_1010p47	0	19	13	25	14	71
30S ribosomal protein S2, partial	6	6	2	37	19	70
atypical/PIKK/PI4K protein kinase	23	9	5	24	9	70
Citrate synthase-like protein	43	15	10	0	2	70
glucosylceramidase	27	12	18	8	5	70
phosphatidylserine decarboxylase	31	13	5	15	6	70
poly(A) binding / translation initiation factor	7	18	14	14	17	70
ribosomal protein L22, putative	27	12	12	9	10	70
Suppressor of the cold-sensitive snRNP biogenesis mutant brr1-1	17	9	10	19	15	70
uncharacterized protein DICPUDRAFT_41714, partial	17	9	10	18	16	70
uncharacterized protein PHACADRAFT_252935	29	18	12	5	6	70
50S ribosomal protein L22, partial	26	14	6	11	12	69
CAMK/CDPK protein kinase	18	15	8	16	12	69
Casein kinase I-like protein hhp2	8	18	8	19	16	69
ferredoxin reductase-like protein	27	12	13	5	12	69
hexokinase-domain-containing protein	25	16	11	8	9	69
hypothetical protein PPTG_14388	30	22	7	4	6	69
mitochondrial F-type ATPase F1 subunit beta, precursor	20	19	12	6	12	69
ribosomal protein S11-domain-containing protein	35	11	10	6	7	69
uncharacterized protein FIBRA_05282	20	14	16	8	11	69
60S ribosomal protein L13e	14	23	13	7	11	68
Ca-transporting ATPase	28	10	13	14	3	68
glycoside hydrolase, putative	37	17	8	6	0	68
heavy metal translocating P-type ATPase	18	16	24	7	3	68
hypothetical protein CTRG_00923	18	12	8	21	9	68
hypothetical protein PPTG_12407	21	18	9	13	7	68
kinesin-domain-containing protein	29	8	2	21	8	68
Paladin	18	30	7	11	2	68
predicted protein, partial	14	15	16	19	4	68
serine/threonine protein phosphatase 2B catalytic subunit	16	10	12	17	13	68
translation initiation factor 3, subunit E	17	15	6	18	12	68
ubiquitin carboxyl-terminal hydrolase 14	10	20	11	14	13	68
uncharacterized protein SPPG_06944	23	10	10	23	2	68
ABC transporter B family protein	39	5	8	10	5	67
elongation factor EF-2	3	28	20	13	3	67
glutathione S-transferase family protein	17	15	14	14	7	67
hypothetical protein CAOG_08245, partial	19	11	17	15	5	67
multi drug resistance-associated protein MRP	38	5	6	12	6	67
NADH-quinone oxidoreductase subunit NuoH	19	11	2	18	17	67
Neutral/alkaline nonlysosomal ceramidase	11	3	11	25	17	67
peptidyl-prolyl cis-trans isomerase B2	49	5	6	5	2	67
Phenylalanine--tRNA ligase beta subunit	10	2	4	30	21	67
plasma-membrane proton-e	31	13	7	10	6	67
ubiquinol-cytochrome c reductase cytochrome c1 subunit	32	14	11	5	5	67
uncharacterized protein BC939DRAFT_149344	22	13	4	16	12	67
uncharacterized protein BYT42DRAFT_565707	13	18	12	16	8	67
uncharacterized protein MSY001_2923	28	8	10	8	13	67
amp dependent CoA ligase	34	8	11	9	4	66
cytochrome oxidase subunit I (mitochondrion)	1	1	0	59	5	66
hypothetical protein EMIHUDRAFT_448294	26	11	1	17	11	66
tyrosine aminotransferase	30	16	11	5	4	66
uncharacterized protein AMSG_01369	21	12	5	18	10	66
uncharacterized protein EHI_006750	43	9	11	3	0	66
uncharacterized protein EV154DRAFT_437020, partial	7	11	11	14	23	66
50S ribosomal protein L30e-like protein	23	11	12	12	7	65
Aminopeptidase 2	14	5	13	20	13	65
endomembrane protein EMP70 precursor isolog, putative	25	13	8	7	12	65
eukaryotic translation elongation factor 2, putative	23	13	9	13	7	65
exonuclease II Exo2	18	13	5	19	10	65
hypothetical protein EMIHUDRAFT_457349	5	19	14	18	9	65
hypothetical protein PHYSODRAFT_560655	31	10	8	10	6	65
putative endo-beta-1,4-glucanase D	0	0	0	65	0	65
ubiquitin-activating enzyme	34	8	8	7	8	65
uncharacterized protein BCR37DRAFT_379834	22	9	12	10	12	65
uncharacterized protein C8R40DRAFT_1054412	6	0	2	38	19	65
uncharacterized protein C9374_004728	33	5	9	12	6	65
uncharacterized protein DICPUDRAFT_49853	32	7	9	11	6	65
uncharacterized protein M409DRAFT_60634	52	2	4	6	1	65
Formation of crista junctions protein 1	21	13	11	9	10	64
hypothetical protein GLOIN_2v1505826	8	17	6	20	13	64
uncharacterized protein FDP41_011284	10	18	6	25	5	64
uncharacterized protein NEUTE1DRAFT_115773	34	10	20	0	0	64
C1 family peptidase, partial	16	10	7	21	9	63
chromatin structure-remodeling complex subunit snf21	43	8	4	3	5	63
cytochrome b6 (plastid)	5	5	2	45	6	63
DNA-directed RNA polymerase subunit beta	8	1	2	40	12	63
hypothetical protein EX895_006191	18	19	8	9	9	63
hypothetical protein PPTG_07447	6	1	7	34	15	63
hypothetical protein SAMD00019534_033220	3	23	27	3	7	63
photosystem II CP47 chlorophyll apoprotein (plastid)	0	0	1	60	2	63
protein kinase C	21	12	14	14	2	63
ribosomal protein RPL5	16	12	16	7	12	63
serine/threonine-protein kinase	44	5	4	7	3	63
uncharacterized protein BATDEDRAFT_13838, partial	27	9	13	6	8	63
uncharacterized protein DICPUDRAFT_36716	49	2	2	3	7	63
uncharacterized protein TREMEDRAFT_41335	16	9	17	12	9	63
vacuolar ATP synthase catalytic subunit a	29	12	16	2	4	63
AGC protein kinase	33	10	9	3	7	62
ATP-dependent metallopeptidase FtsH/Yme1/Tma family protein, partial	24	11	16	7	4	62
DUF221-domain-containing protein	20	0	0	34	8	62
elongation factor EF-1 alpha subunit	18	6	3	28	7	62
hypothetical protein IMG5_062800	35	9	5	10	3	62
hypothetical protein SPRG_03499	27	5	10	9	11	62
methylenetetrahydrofolate reductase	27	14	10	6	5	62
ribosomal L7Ae/L30e/S12e/Gadd45 family protein, partial	5	7	4	37	9	62
uncharacterized protein F5J12DRAFT_836728	8	19	15	8	12	62
uncharacterized protein K450DRAFT_223875	22	14	11	8	7	62
40S ribosomal protein S11-B	21	14	2	0	24	61
actin 2 protein, putative, partial	15	11	13	17	5	61
ankyrin repeat domain-containing protein	14	16	10	16	5	61
ATP dependent helicase	16	18	8	14	5	61
exodeoxyribonuclease III	7	18	10	12	14	61
glyceraldehyde-3-phosphate dehydrogenase 3	15	10	13	15	8	61
GSP1	29	5	9	7	11	61
hypothetical protein GUITHDRAFT_81252	21	10	7	17	6	61
hypothetical protein POSPLADRAFT_1046740	34	7	6	10	4	61
hypothetical protein SPRG_12015	19	12	16	6	8	61
LAGLIDADG endonuclease, partial (mitochondrion)	0	0	0	55	6	61
luminal binding protein BiP	15	16	16	8	6	61
MULTISPECIES: photosystem I core protein PsaA	13	0	0	28	20	61
photosystem I reaction center subunit III (chloroplast)	3	1	0	51	6	61
photosystem I reaction center subunit XI (chloroplast)	0	2	0	58	1	61
translation initiation factor SUI1	10	9	5	22	15	61
ubiquitin fusion protein, partial	4	0	3	45	9	61
uncharacterized protein MONBRDRAFT_18960	31	13	13	1	3	61
uncharacterized protein SERLADRAFT_477980	19	10	7	16	9	61
60S ribosomal protein	11	13	11	12	13	60
glycoside hydrolase superfamily	26	7	3	19	5	60
Hypothetical protein Ecym_8274	26	7	10	10	7	60
hypothetical protein EMIHUDRAFT_356928, partial	32	10	8	2	8	60
hypothetical protein GUITHDRAFT_100563	22	14	17	5	2	60
OPT oligopeptide transporter	12	5	3	33	7	60
photosystem II protein D2 (chloroplast)	18	7	7	27	1	60
photosystem II reaction center protein CP43	2	2	2	53	1	60
uncharacterized protein AMSG_10443	39	4	3	13	1	60
uncharacterized protein SmJEL517_g06207	19	15	8	12	6	60
uncharacterized protein SPPG_05493	34	9	3	8	6	60
2-oxoglutarate dehydrogenase, mitochondrial	20	12	6	12	9	59
60S ribosomal protein L23	41	2	0	9	7	59
ADP-ribosylation factor 1-like 2	27	2	5	13	12	59
ATP-dependent DNA helicase Snf21	1	14	3	25	16	59
ATP synthase F0 subunit c (mitochondrion)	0	2	0	41	16	59
beta and beta-prime subunits of DNA dependent RNA-polymerase	0	11	2	38	8	59
form I ribulose bisphosphate carboxylase large subunit	4	4	10	38	3	59
glyceraldehyde 3-phosphate dehydrogenase NAD-binding domain-containing protein, partial	27	4	11	10	7	59
hypothetical protein AGABI2DRAFT_137870	27	12	4	4	12	59
hypothetical protein GUITHDRAFT_114298	12	11	7	14	15	59
Metalloprotease	0	0	0	59	0	59
photosystem II protein D2 (plastid)	9	5	1	37	7	59
small GTPase	21	14	8	8	8	59
translation elongation factor 1-alpha	0	0	0	35	24	59
uncharacterized protein B0J15DRAFT_549457	34	3	9	8	5	59
uncharacterized protein MSY001_1509	41	7	5	5	1	59
uncharacterized protein PC9H_005200	37	11	5	5	1	59
uncharacterized protein PHACADRAFT_136916	33	7	6	7	6	59
ATP-binding cassette transporter 1	22	7	8	9	12	58
hypothetical protein SDRG_04376	25	7	10	5	11	58
myosin IA heavy chain	22	7	5	13	11	58
NADH dehydrogenase subunit 5, partial	0	0	0	43	15	58
oxalate decarboxylase	0	0	0	39	19	58
PRMT-1 protein	19	5	8	15	11	58
regulator-nonsense transcripts 1	14	9	8	23	4	58
ubiquitin carboxyl-terminal hydrolase	29	7	4	11	7	58
uncharacterized protein AMSG_05621	23	17	9	1	8	58
uncharacterized protein C9374_004694	32	9	7	5	5	58
uncharacterized protein DL89DRAFT_267368	9	19	12	7	11	58
uncharacterized protein MONBRDRAFT_26326, partial	10	10	7	27	4	58
uncharacterized protein MONBRDRAFT_27585	13	13	13	15	4	58
uncharacterized protein TRAVEDRAFT_68533	0	0	0	48	10	58
Alpha-galactosidase, partial	12	18	12	9	6	57
camk camk1 protein kinase	16	9	14	15	3	57
hypothetical protein EMIHUDRAFT_97896	28	9	7	11	2	57
methylenetetrahydrofolate reductase (NADPH)	11	22	10	10	4	57
midasin	14	8	4	24	7	57
MULTISPECIES: photosystem II reaction center protein CP43	10	0	0	39	8	57
putative ATG8-essential for autophagy	16	10	7	13	11	57
putative RNA polymerase I and III transcription factor complex component Tbp	20	9	3	18	7	57
ribosomal protein S17-domain-containing protein	18	17	8	5	9	57
uncharacterized protein BATDEDRAFT_16209	21	14	14	6	2	57
uncharacterized protein C5L36_0E03240	32	5	6	9	5	57
uncharacterized protein DI09_48p220	29	7	0	9	12	57
uncharacterized protein KUCA_T00005657001	12	11	8	21	5	57
uncharacterized protein LACBIDRAFT_187856	39	6	3	6	3	57
uncharacterized protein MONBRDRAFT_34982	30	4	7	8	8	57
uncharacterized protein PV09_00508	19	7	15	13	3	57
Cullin-associated and neddylation-dissociated 1	31	4	5	9	7	56
dolichyl-diphosphooligosaccharide-protein glycosyltransferase subunit STT3A, putative	6	21	18	4	7	56
EVH1 domain-containing protein	20	6	8	17	5	56
MULTISPECIES: DUF1257 domain-containing protein	29	2	0	13	12	56
subunit beta of ATP synthase	11	20	8	10	7	56
tubulin beta-4 chain	0	0	0	36	20	56
uncharacterized protein BO72DRAFT_273899	29	7	5	11	4	56
uncharacterized protein DI09_11p260	8	11	4	18	15	56
uncharacterized protein KL928_003496	20	2	16	5	13	56
uncharacterized protein SmJEL517_g03534	15	13	11	11	6	56
ATP-dependent RNA helicase	28	10	0	6	11	55
ATP-dependent zinc metalloprotease FtsH, partial	36	13	0	5	1	55
cytochrome c oxydase subunit 3 (mitochondrion)	0	0	1	30	24	55
dihydroxy-acid dehydratase	10	9	5	20	11	55
Epsin domain protein	19	2	5	15	14	55
glycoside hydrolase family 18 protein	0	0	0	52	3	55
HAD-IC family P-type ATPase, partial	10	3	11	24	7	55
histone-fold-containing protein	24	2	5	20	4	55
hypothetical protein AURANDRAFT_72240	38	9	4	2	2	55
hypothetical protein GUITHDRAFT_121066	14	6	6	22	7	55
hypothetical protein SAMD00019534_100130, partial	21	10	7	13	4	55
NADH dehydrogenase subunit 4, partial	0	0	0	31	24	55
putative endoplasmic reticulum calcium ATPase	14	12	11	11	7	55
putative glutamate synthase Glt1	33	2	2	11	7	55
putative UDP-N-acetylglucosamine pyrophosphorylase	18	11	5	15	6	55
ribosomal protein L30, ferredoxin-like fold domain-containing protein	20	2	2	10	21	55
structural constituent of cytoskeleton	17	4	5	18	11	55
uncharacterized protein CAGL0D05808g	24	14	4	11	2	55
uncharacterized protein L969DRAFT_54488	0	13	6	16	20	55
uncharacterized protein MONBRDRAFT_39307	31	10	4	5	5	55
uncharacterized protein P152DRAFT_297809	0	0	0	55	0	55
uncharacterized protein PUNSTDRAFT_95790	0	0	0	44	11	55
uncharacterized protein SERLADRAFT_360403	29	3	6	5	12	55
60S ribosomal protein L13, partial	11	15	14	10	4	54
aminopeptidase 2	15	12	9	10	8	54
arginine nmethyltransferase, putative	16	9	9	10	10	54
glycogen phosphorylase	3	14	13	19	5	54
glycoside hydrolase family 5 protein	0	1	0	36	17	54
hypothetical protein AGABI2DRAFT_189825	33	2	4	10	5	54
hypothetical protein EMIHUDRAFT_117847	13	11	5	10	15	54
hypothetical protein EMIHUDRAFT_449765	17	8	17	6	6	54
hypothetical protein EMIHUDRAFT_60194, partial	22	10	8	11	3	54
MULTISPECIES: actin [Bacteria	15	10	4	10	15	54
NAD-malate dehydrogenase	15	9	25	4	1	54
peptidyl-prolyl cis-trans isomerase; ppiase	30	5	16	2	1	54
protein transporter sec61 subunit alpha isoform 2	8	15	10	5	16	54
RNA dependent RNA polymerase	0	0	0	54	0	54
serine/threonine protein kinase 15	14	12	16	6	6	54
ubiquitin/60S ribosomal protein L40 fusion	10	12	11	11	10	54
uncharacterized protein DACRYDRAFT_92799	14	9	3	16	12	54
uncharacterized protein FOMMEDRAFT_133567	0	0	0	48	6	54
uncharacterized protein K450DRAFT_233117	29	7	4	6	8	54
60S ribosomal protein l15	17	13	7	12	4	53
adenylate kinase 2	38	1	3	6	5	53
calmodulin-domain kinase	10	4	12	20	7	53
hypothetical protein FPOAC1_004414	17	8	8	4	16	53
hypothetical protein SARC_13329	23	9	8	3	10	53
hypothetical protein WALSEDRAFT_14923	43	3	4	3	0	53
nucleotide-diphospho-sugar transferase	6	13	15	5	14	53
ribonuclease H-like domain-containing protein	28	5	14	2	4	53
uncharacterized protein HETIRDRAFT_386831	21	12	12	7	1	53
uncharacterized protein KL911_005014	24	9	16	0	4	53
uncharacterized protein MONBRDRAFT_21355	9	40	4	0	0	53
uncharacterized protein PC9H_005463	0	0	0	45	8	53
uncharacterized protein SPAPADRAFT_154321	22	8	6	13	4	53
14-3-3 protein-like protein	35	4	1	6	6	52
dolichyl-diphosphooligosaccharide-protein glycosyltransferase subunit STT3A	24	11	9	5	3	52
helicase-related protein, partial	4	11	9	18	10	52
hypothetical protein PNEG_01920	27	8	6	3	8	52
integral membrane protein 1 isoform 5, putative	16	19	5	11	1	52
Mg-protoporphyrin IX monomethyl ester oxidative cyclase (chloroplast)	1	18	32	1	0	52
myosin 5	5	9	7	15	16	52
phosphate transporter	0	0	0	51	1	52
polyadenylate-binding protein family protein	1	11	7	22	11	52
RICIN domain-containing protein	32	6	7	3	4	52
uncharacterized protein GSPATT00004256001	18	15	7	11	1	52
uncharacterized protein K450DRAFT_236268	25	13	9	2	3	52
uncharacterized protein SmJEL517_g03087	30	3	6	7	6	52
40S ribosomal protein S0	1	2	0	28	20	51
carboxypeptidase D	33	3	8	6	1	51
chromatin remodeling complex SWI/SNF, component SWI2 and ATPase	26	3	7	5	10	51
histone-fold-containing protein, partial	19	6	10	14	2	51
Hsp90 beta	44	3	2	2	0	51
hypothetical protein GUITHDRAFT_116204	19	16	12	2	2	51
Sec23/Sec24 trunk domain-containing protein	20	7	6	7	11	51
symbiosis-like protein	30	6	6	9	0	51
uncharacterized protein AUEXF2481DRAFT_45893	20	12	7	8	4	51
uncharacterized protein CONPUDRAFT_89911	13	8	15	10	5	51
uncharacterized protein EV422DRAFT_537294	20	7	6	13	5	51
uncharacterized protein K450DRAFT_221813	12	14	8	7	10	51
uncharacterized protein MGL_3697	4	10	7	12	18	51
uncharacterized protein SPPG_06272	32	3	6	6	4	51
zinc-binding dehydrogenase, partial	9	18	7	9	8	51
60s ribosomal protein	16	7	3	6	18	50
60S ribosomal protein L37a	11	15	12	5	7	50
alpha mannosidase	23	8	10	3	6	50
ATP-dependent helicase STH1/SNF2	17	2	8	18	5	50
ATP-dependent RNA helicase DBP8	9	11	3	15	12	50
dynein heavy chain	0	1	0	42	7	50
hypothetical protein POSPLADRAFT_1151193	9	15	17	4	5	50
isocitrate dehydrogenase [NADP]	29	7	11	1	2	50
mitogen activated protein kinase	8	10	5	20	7	50
MULTISPECIES: 3-oxoacyl-ACP reductase FabG	37	3	1	5	4	50
MULTISPECIES: S9 family peptidase	10	13	14	6	7	50
NADPH-dependent glutamate synthase	10	1	0	31	8	50
non-reducing end alpha-L-arabinofuranosidase family hydrolase	0	0	0	50	0	50
proteasome regulatory particle base subunit RPN1	26	10	6	3	5	50
putative alpha-aminoadipic semialdehyde synthase	11	13	9	9	8	50
putative ste ste20 ysk protein kinase protein	21	9	7	7	6	50
translation factor pelota	20	3	8	16	3	50
tyrosine-protein kinase transforming protein SEA	25	5	6	7	7	50
uncharacterized protein BATDEDRAFT_8676, partial	19	7	12	5	7	50
uncharacterized protein M409DRAFT_55655	21	12	10	1	6	50
uncharacterized protein PHACADRAFT_251073	24	4	6	10	6	50
uncharacterized protein PHACADRAFT_99790	32	8	7	2	1	50
uncharacterized protein WICANDRAFT_33174	7	4	11	20	8	50
26S proteasome regulatory complex, non-ATPase subcomplex, Rpn1 subunit	6	11	11	13	8	49
30S ribosomal protein S5	0	0	0	36	13	49
30S ribosomal protein S5, partial	0	0	0	33	16	49
40S ribosomal protein S15	7	2	4	25	11	49
acetyl/propionyl/methylcrotonyl-CoA carboxylase subunit alpha	10	15	6	10	8	49
Antiquitin, putative	4	13	4	17	11	49
cysteine peptidase C (CPC)	40	0	1	6	2	49
glycoside hydrolase family 35 protein	17	0	1	24	7	49
GTP-binding protein TypA	24	8	10	6	1	49
hypothetical protein EMIHUDRAFT_421454	5	12	8	13	11	49
hypothetical protein PHYBLDRAFT_129342, partial	14	6	8	16	5	49
hypothetical protein PHYSODRAFT_284123	29	7	7	3	3	49
kinase domain protein	20	11	10	5	3	49
phycocyanin alpha subunit (plastid)	5	1	0	37	6	49
plasma membrane H(+)-ATPase 1	8	14	6	6	15	49
putative ATP-dependent RNA helicase	13	6	15	5	10	49
putative RPL3-60s ribosomal protein l3	9	22	14	1	3	49
uncharacterized protein DIURU_003548	26	1	15	2	5	49
uncharacterized protein EV420DRAFT_1259977	0	0	0	44	5	49
uncharacterized protein MIND_01394300	0	0	0	42	7	49
uncharacterized protein MONBRDRAFT_650, partial	19	7	5	15	3	49
uncharacterized protein STEHIDRAFT_148616	0	0	0	46	3	49
40S ribosomal protein S3aE	11	19	13	5	0	48
40S ribosomal protein s5	0	10	6	14	18	48
50S ribosomal protein L5, partial	13	9	2	21	3	48
60S ribosomal protein L34-B	21	10	2	5	10	48
amino acid/polyamine transporter I	3	2	1	39	3	48
ATP-binding cassette	16	8	5	11	8	48
beta-glucosidase 1A	14	7	10	12	5	48
CHAT domain-containing protein	11	16	10	6	5	48
fibronectin type III domain-containing protein	0	0	0	33	15	48
glycosyl transferase family 41-domain-containing protein	16	5	10	6	11	48
hypothetical protein SAMD00019534_048800	11	6	9	11	11	48
molecular chaperone HtpG	16	2	5	17	8	48
putative polyadenylate protein with binding domain	7	10	7	10	14	48
putative Rrp44p protein	18	8	3	13	6	48
Sulfate transporter	10	16	6	14	2	48
translation elongation factor EF-1 alpha	6	0	4	28	10	48
uncharacterized protein K450DRAFT_272038, partial	4	7	0	24	13	48
uncharacterized protein NAEGRDRAFT_32557	40	1	0	6	1	48
uncharacterized protein SCHCODRAFT_02702724	0	0	0	45	3	48
adaptin n terminal region domain-containing protein	12	11	7	8	9	47
ATP10A protein	8	10	6	15	8	47
cation transporting protein	29	2	1	12	3	47
elongation factor Tu GTP binding domain containing 2	6	4	1	24	12	47
hypothetical protein J7337_008695	13	11	11	9	3	47
hypothetical protein SAMD00019534_037270	26	3	6	6	6	47
hypothetical protein SAMD00019534_112800	20	14	9	2	2	47
hypothetical protein SCDLUD_000217	17	3	1	18	8	47
MULTISPECIES: photosystem II q(b) protein, partial	13	6	8	12	8	47
oxysterol-binding protein 1	26	6	8	5	2	47
propionyl-CoA carboxylase	24	4	9	7	3	47
serine/threonine-protein phosphatase 2B catalytic subunit	5	8	3	25	6	47
structural constituent of ribosome	13	8	3	11	12	47
uncharacterized protein B0P05DRAFT_556229, partial	19	6	5	4	13	47
uncharacterized protein DICPUDRAFT_151088	17	10	6	7	7	47
uncharacterized protein EJ05DRAFT_475846	0	0	0	46	1	47
uncharacterized protein EV422DRAFT_68862	10	15	13	5	4	47
uncharacterized protein J056_000750	0	18	12	8	9	47
uncharacterized protein M436DRAFT_74174	6	12	3	11	15	47
uncharacterized protein MIND_01384700	13	3	11	12	8	47
uncharacterized protein O0I10_002995	26	3	4	4	10	47
uncharacterized protein PC9H_000226	0	2	0	35	10	47
uncharacterized protein SETTUDRAFT_169661	12	10	7	11	7	47
uncharacterized protein SmJEL517_g05393	7	7	4	17	12	47
aminophospholipid-transporting P-type ATPase	8	10	8	15	5	46
beta-N-acetylhexosaminidase	25	5	6	3	7	46
Calcium-transporting ATPase	27	8	8	2	1	46
calmodulin	15	4	2	19	6	46
cytidine deaminase-like protein	9	6	10	7	14	46
DNA-directed RNA polymerase III largest subunit	19	2	5	7	13	46
DUF300-domain-containing protein	19	8	6	9	4	46
endoplasmic reticulum Ca-transporting P-type ATPase	17	7	4	10	8	46
Exoglucanase 1	0	0	0	45	1	46
heat shock protein 90 kDa	17	9	9	9	2	46
heat shock protein of Hsp90 family	7	8	12	6	13	46
hypothetical protein EX895_006052	28	6	2	7	3	46
hypothetical protein H310_07313	3	16	11	10	6	46
hypothetical protein POSPLADRAFT_1065405	22	12	6	3	3	46
hypothetical protein SARC_12638, partial	14	13	4	6	9	46
L domain-like protein	14	5	12	10	5	46
large subunit ribosomal protein L19e, cytoplasmic	3	10	3	15	15	46
LETM1-domain-containing protein	15	6	7	10	8	46
MULTISPECIES: peptidylprolyl isomerase	17	7	9	11	2	46
NAD-dependent epimerase/dehydratase family protein	16	15	6	7	2	46
uncharacterized protein EDI_141420	9	8	5	10	14	46
uncharacterized protein KD926_000588	11	8	14	5	8	46
uncharacterized protein PV10_08091	25	4	5	6	6	46
40S ribosomal protein S3-B	26	4	10	4	1	45
actin-related protein 2	6	10	4	17	8	45
ATP synthase CF1 beta subunit (chloroplast)	12	3	4	25	1	45
E1A binding protein p300, variant	14	8	7	10	6	45
Histidine kinase	21	0	2	20	2	45
histone H3, putative, partial	21	7	10	5	2	45
hypothetical protein LEMA_P004120.1	20	8	8	6	3	45
hypothetical protein PHYBLDRAFT_76956	6	7	24	1	7	45
LETM1-like protein-domain-containing protein	10	13	10	4	8	45
Metallo-dependent phosphatase	0	1	2	36	6	45
P-glycoprotein, partial	16	8	6	10	5	45
proteasome subunit alpha type 3, putative	14	13	6	9	3	45
putative DEAD/DEAH box helicase	9	13	7	14	2	45
translationally controlled tumor-associated	16	10	7	7	5	45
uncharacterized protein BT62DRAFT_275787	0	0	0	33	12	45
uncharacterized protein GSTUM_00004330001	23	5	10	6	1	45
uncharacterized protein NGA_0437801	21	13	2	8	1	45
uncharacterized protein PHACADRAFT_263678	17	8	6	6	8	45
uncharacterized protein PtA15_7A474	17	3	4	13	8	45
uncharacterized protein RHOBADRAFT_38105	20	7	5	4	9	45
ATP-utilizing phosphoenolpyruvate carboxykinase	24	1	4	12	3	44
Ca2+-transporting ATPase	27	5	6	2	4	44
cytochrome P450 oxidoreductase	9	16	7	10	2	44
fimbrin	17	2	11	9	5	44
Glutamate synthase (plastid)	12	11	16	2	3	44
hydrogen/potassium-exchanging ATPase 4A	6	0	0	33	5	44
hypothetical protein CAOG_03695	0	0	0	16	28	44
hypothetical protein NCAS_0D04380	34	0	9	1	0	44
hypothetical protein PHYSODRAFT_261764, partial	18	7	5	7	7	44
hypothetical protein PHYSODRAFT_285581	38	4	0	0	2	44
hypothetical protein SARC_00874	21	9	10	2	2	44
hypothetical protein SARC_02240	4	7	9	15	9	44
LAGLIDADG endonuclease (mitochondrion)	0	0	1	41	2	44
myosin ID heavy chain	9	6	2	19	8	44
pectate lyase	0	0	0	41	3	44
poly A binding protein	3	11	6	11	13	44
Protein disulfide-isomerase	10	2	2	25	5	44
Protein phosphatase PP2A regulatory subunit B	3	10	10	12	9	44
putative helicase mug81	8	4	4	17	11	44
thiamine diphosphate-binding protein	16	12	11	5	0	44
TK protein kinase	8	1	1	24	10	44
Transcription elongation factor, putative	18	11	6	5	4	44
uncharacterized protein BX663DRAFT_502050	7	6	12	10	9	44
uncharacterized protein DICPUDRAFT_98061	28	2	10	2	2	44
uncharacterized protein F5J12DRAFT_129874	8	7	8	18	3	44
uncharacterized protein GSPATT00019089001	16	4	3	12	9	44
uncharacterized protein K450DRAFT_243163	3	15	9	13	4	44
uncharacterized protein MONBRDRAFT_38294	15	12	7	5	5	44
uncharacterized protein PTSG_02701	31	9	2	2	0	44
uncharacterized protein SPPG_00395	19	2	6	15	2	44
Vacuolar protein sorting/targeting protein	23	2	5	9	5	44
50S ribosomal protein L13e	14	11	8	6	4	43
60S ribosomal protein L3	8	7	1	17	10	43
Aldehyde dehydrogenase	12	7	8	12	4	43
bleomycin hydrolase	5	0	0	29	9	43
chromodomain helicase DNA binding protein CHD	22	4	9	7	1	43
Cox1 (mitochondrion)	1	0	0	27	15	43
cytochrome b6 (chloroplast)	9	0	2	24	8	43
dolichyl-diphosphooligosaccharide--protein glycosyltransferase subunit stt3a-like	21	5	7	8	2	43
glycoside hydrolase family 31 protein	9	5	3	14	12	43
hypothetical protein DDB_G0273121	11	7	8	9	8	43
hypothetical protein GUITHDRAFT_147173	18	0	1	11	13	43
hypothetical protein GUITHDRAFT_73978, partial	9	8	7	9	10	43
hypothetical protein SCP_1003250	16	9	7	5	6	43
methionine--tRNA ligase	12	5	7	12	7	43
myosin N-terminal SH3-like domain-containing protein, partial	0	0	0	18	25	43
regulator of nonsense transcripts 1 homolog	6	12	8	15	2	43
RSC-type complex ATPase Snf21	6	7	11	16	3	43
serine/threonine kinase, putative	10	12	6	3	12	43
sulfate adenylyltransferase	16	11	6	7	3	43
thioredoxin-like domain-containing protein	11	10	13	8	1	43
uncharacterized protein BX664DRAFT_4625	28	3	5	4	3	43
uncharacterized protein CONPUDRAFT_101339	31	1	4	5	2	43
uncharacterized protein HETIRDRAFT_474586	6	6	8	14	9	43
40S ribosomal protein S4	1	6	3	18	14	42
60S ribosomal protein L17e	17	15	4	4	2	42
AAA-domain-containing protein	10	7	5	13	7	42
acetyl-coenzyme A synthetase	8	12	4	10	8	42
ATP synthase CF1 subunit alpha (chloroplast)	7	1	0	33	1	42
cation diffusion facilitator family transporter	6	9	11	14	2	42
glycoside hydrolase family 9 protein, partial	30	5	7	0	0	42
hypothetical protein EX895_005387	23	4	1	13	1	42
hypothetical protein SAMD00019534_025150	0	2	0	23	17	42
nitrilase-related carbon-nitrogen hydrolase	28	2	5	2	5	42
outer dynein arm heavy chain beta	0	0	0	20	22	42
peptidase family M1-domain-containing protein	5	10	7	16	4	42
photosystem II PsbE protein (plastid)	16	0	1	24	1	42
ribosomal protein L16, partial	1	7	1	22	11	42
Serine/threonine-protein kinase	19	5	5	8	5	42
transcription factor/nuclear export subunit protein 2-domain-containing protein	5	11	2	16	8	42
transmembrane protein TM9SF3	13	1	1	19	8	42
ubiquitin-protein ligase	16	7	9	8	2	42
uncharacterized protein BATDEDRAFT_18673	34	1	2	3	2	42
uncharacterized protein BATDEDRAFT_4618, partial	17	12	6	7	0	42
uncharacterized protein K450DRAFT_259099	21	6	3	9	3	42
uncharacterized protein MELLADRAFT_45123	11	13	10	5	3	42
uncharacterized protein SmJEL517_g02534	24	7	2	8	1	42
Apocytochrome b (mitochondrion)	0	0	0	38	3	41
cytochrome b N-terminal domain-containing protein	0	0	0	35	6	41
hypothetical protein EX895_001444	14	8	5	8	6	41
hypothetical protein GLOIN_2v1463764	16	6	5	7	7	41
hypothetical protein PHYBLDRAFT_87438, partial	13	8	2	9	9	41
magnesium chelatase subunit H	5	14	11	11	0	41
Metallo-dependent phosphatase-like protein	8	5	1	22	5	41
methionine adenosyltransferase	4	0	0	10	27	41
NADH kinase	16	9	7	9	0	41
NADPH oxidase isoform 2	10	2	6	16	7	41
PRC-barrel domain-containing protein	0	1	0	32	8	41
ribosomal protein l18	15	5	6	12	3	41
S-adenosyl-L-methionine-dependent methyltransferase, partial	22	5	3	6	5	41
translation factor pelota, putative	14	9	5	8	5	41
translational elongation factor EF-1 alpha	9	9	6	13	4	41
uncharacterized protein AUEXF2481DRAFT_8894	17	9	5	7	3	41
uncharacterized protein GSTUM_00010993001	10	11	4	13	3	41
uncharacterized protein HETIRDRAFT_247047, partial	0	0	0	36	5	41
uncharacterized protein K450DRAFT_250465	2	7	11	17	4	41
uncharacterized protein PpBr36_05922	21	11	4	0	5	41
uncharacterized protein SCHCODRAFT_02604446	13	7	3	11	7	41
uncharacterized protein TRAVEDRAFT_25664	0	0	0	30	11	41
UPF0187-domain-containing protein	0	0	0	40	1	41
2-oxoglutarate dehydrogenase complex E1 component mitochondrial precursor	14	8	10	5	3	40
ABC transporter	13	2	2	19	4	40
alpha tubulin, (fragment), partial	14	8	4	5	9	40
CDC48, N-terminal subdomain protein	20	5	1	8	6	40
DNA ligase	16	5	10	6	3	40
elongation factor 1b	21	5	3	5	6	40
elongation factor Tu, partial	3	7	6	14	10	40
hexokinase-2	21	4	8	3	4	40
hypothetical protein AGABI2DRAFT_66879	16	14	5	2	3	40
hypothetical protein GUITHDRAFT_85427	8	7	1	16	8	40
hypothetical protein POSPLADRAFT_1180860	11	13	8	5	3	40
hypothetical protein SAMD00019534_117250	7	10	12	8	3	40
hypothetical protein SARC_00315	28	2	4	3	3	40
L30/L7 family 60S ribosomal protein, partial	9	0	1	18	12	40
nucleoside hydrolase	6	15	10	6	3	40
S-adenosyl-L-methionine-dependent methyltransferase	8	8	7	11	6	40
serine-threonine protein kinase, plant-type, putative	31	5	3	1	0	40
uncharacterized protein AGABI1DRAFT_68456	16	5	7	9	3	40
uncharacterized protein GSPATT00036831001	15	6	3	7	9	40
uncharacterized protein MONBRDRAFT_20656	17	4	2	15	2	40
uncharacterized protein MONBRDRAFT_34057	25	4	4	7	0	40
uncharacterized protein MONBRDRAFT_37243, partial	12	12	8	8	0	40
uncharacterized protein NEUTE1DRAFT_79498	38	0	0	2	0	40
uncharacterized protein OGAPHI_005093	13	6	2	10	9	40
uncharacterized protein PC9H_004643	4	13	10	12	1	40
uncharacterized protein PHACADRAFT_247179	10	5	8	14	3	40
uncharacterized protein PTSG_12189	20	9	4	1	6	40
uncharacterized protein SERLADRAFT_370818	7	2	9	18	4	40
uncharacterized protein SmJEL517_g00007	10	8	4	15	3	40
60S ribosomal protein L8	9	3	6	11	10	39
AGC/PKC/ETA protein kinase	11	3	6	10	9	39
Bromodomain-containing protein	15	4	2	8	10	39
DnaJ C-terminal domain-containing protein	10	6	5	13	5	39
Dynamin central region-domain-containing protein	17	3	12	4	3	39
glycoside hydrolase family 27 protein	8	4	4	19	4	39
GTP-binding nuclear protein GSP1/Ran	6	10	10	5	8	39
hypothetical protein AGABI2DRAFT_133083	0	0	0	24	15	39
hypothetical protein L202_05911	18	6	7	3	5	39
hypothetical protein M430DRAFT_98870	17	21	1	0	0	39
MULTISPECIES: photosystem II q(b) protein	5	3	7	21	3	39
NADH dehydrogenase subunit 4L (mitochondrion)	6	1	2	26	4	39
photosystem II D2 protein (photosystem q(a) protein), partial	3	2	2	27	5	39
photosystem II reaction center protein D2 (chloroplast)	5	1	0	32	1	39
protein kinase C II	7	6	15	8	3	39
protein transporter SEC24	6	8	7	9	9	39
putative CHC1-clathrin heavy chain	7	6	6	13	7	39
putative glucokinase	9	11	11	4	4	39
ribosomal protein L13e, putative	3	14	8	6	8	39
RuBisCO large subunit C-terminal-like domain-containing protein	15	2	10	12	0	39
signal peptidase subunit	8	9	5	11	6	39
small GTP-binding protein domain	1	8	3	13	14	39
Superoxide dismutase	1	13	9	11	5	39
Translation initiation factor eIF3, subunit E	5	4	3	12	15	39
ubiquitin family protein, partial	3	5	6	14	11	39
uncharacterized protein INS49_004519	19	5	0	9	6	39
uncharacterized protein Kpol_541p40	18	2	4	13	2	39
uncharacterized protein PC9H_003685	18	6	10	4	1	39
uncharacterized protein SCHCODRAFT_02493264	0	0	0	37	2	39
30S ribosomal protein S12, partial	14	6	0	14	4	38
30S ribosomal protein S15, partial	0	4	1	23	10	38
50S ribosomal protein L2, partial	9	0	0	18	11	38
60S ribosomal protein L10	0	3	1	22	12	38
ATP synthase subunit beta vacuolar, putative, partial	14	9	8	4	3	38
cysteine proteinase 3	9	12	13	2	2	38
Diacylglycerol kinase	15	14	3	3	3	38
Glyceraldehyde-3-phosphate dehydrogenase (phosphorylating)	25	3	4	2	4	38
hypothetical protein CC1G_07289	27	6	4	0	1	38
hypothetical protein PHYSODRAFT_557961, partial	25	3	6	1	3	38
Mitogen-activated protein kinase	16	6	1	10	5	38
Mss4-like protein	0	7	1	26	4	38
non-reducing end alpha-L-arabinofuranosidase family hydrolase, partial	0	0	0	35	3	38
polyadenylate-binding protein	15	3	3	13	4	38
prohibitin-2	8	6	4	15	5	38
putative beta adaptin protein	22	2	6	2	6	38
putative ribosomal protein L9	6	10	5	8	9	38
serine/threonine-protein kinase ppk15	12	10	1	8	7	38
T-complex protein 1 subunit theta	15	6	5	3	9	38
uncharacterized protein E1B28_010537	26	1	2	7	2	38
uncharacterized protein GSPATT00014660001	26	2	7	1	2	38
uncharacterized protein HETIRDRAFT_408220	1	11	15	6	5	38
uncharacterized protein HO133_005646	13	4	8	6	7	38
uncharacterized protein K452DRAFT_253230	27	3	4	2	2	38
uncharacterized protein SERLADRAFT_476145	11	5	5	12	5	38
uncharacterized protein SPPG_09238	8	10	3	11	6	38
YALI0A17468p	15	7	6	3	7	38
3-oxoacyl-[acyl-carrier-protein] reductase	16	2	10	8	1	37
Actin/actin-like protein	15	2	2	8	10	37
allophycocyanin alpha subunit (chloroplast)	1	3	0	33	0	37
allophycocyanin subunit alpha	0	0	0	34	3	37
ARF/SAR superfamily	8	5	6	14	4	37
DUF1257 domain-containing protein	2	6	0	24	5	37
Glu/Leu/Phe/Val dehydrogenase	8	9	4	9	7	37
glycosyl hydrolase family 62 protein	0	0	0	35	2	37
GTP-binding protein y.t1.c1	15	4	5	8	5	37
hypothetical protein DSM5745_10591	1	7	5	20	4	37
hypothetical protein GLOIN_2v1675559	17	10	2	5	3	37
hypothetical protein M430DRAFT_51736	20	4	6	6	1	37
hypothetical protein M430DRAFT_99999	9	4	8	4	12	37
hypothetical protein M441DRAFT_143705	4	4	5	17	7	37
methionyl-tRNA synthetase	5	3	9	15	5	37
mitochondrial carrier domain-containing protein	15	6	7	7	2	37
NADH-quinone oxidoreductase subunit H, partial	0	0	0	34	3	37
PHD transcription factor	23	5	6	3	0	37
photosystem II chlorophyll-binding protein CP47	9	0	0	22	6	37
photosystem II CP43 chlorophyll apoprotein (plastid)	3	2	1	29	2	37
photosystem II protein D2, partial	6	4	2	21	4	37
Poly(A) polymerase central domain-containing protein	12	6	8	6	5	37
preprocathepsin D	6	10	3	9	9	37
protein kinase, putative	11	6	3	11	6	37
RAB GDP-dissociation inhibitor	17	6	4	5	5	37
rac protein	4	3	5	14	11	37
T-complex protein 1, theta subunit	22	4	5	4	2	37
translational GTPase TypA	13	5	12	6	1	37
uncharacterized protein ATNIH1004_002309	15	5	6	8	3	37
uncharacterized protein BJ171DRAFT_520094	18	3	3	6	7	37
uncharacterized protein BU24DRAFT_352891	0	0	0	28	9	37
uncharacterized protein E1B28_012579	12	7	9	3	6	37
uncharacterized protein EI90DRAFT_3127795	8	5	3	19	2	37
uncharacterized protein EV420DRAFT_1648338	0	0	0	37	0	37
uncharacterized protein EV422DRAFT_546781	18	8	3	4	4	37
uncharacterized protein LACBIDRAFT_177012	22	5	4	2	4	37
uncharacterized protein O0I10_006189	10	13	11	2	1	37
uncharacterized protein P152DRAFT_456856	6	9	8	6	8	37
uncharacterized protein RHOBADRAFT_66766	1	2	0	21	13	37
uncharacterized protein SPPG_07224	0	0	0	15	22	37
2Fe-2S iron-sulfur cluster-binding protein	15	6	2	12	1	36
Asp-domain-containing protein	3	12	9	11	1	36
ATP synthase alpha/beta family, nucleotide-binding domain-containing protein, partial	29	2	2	1	2	36
Bromodomain containing protein	3	9	6	11	7	36
co-chaperone GroES	0	6	5	20	5	36
deubiquitinating enzyme	8	11	4	8	5	36
Formate dehydrogenase	10	4	4	14	4	36
glutathione-disulfide reductase	24	1	3	7	1	36
hypothetical protein COCVIDRAFT_27661	0	0	0	36	0	36
hypothetical protein LMH87_011563	9	3	4	11	9	36
LAGLIDADG homing endonuclease, partial (mitochondrion)	0	0	0	31	5	36
photosystem I P700 chlorophyll a apoprotein A1 (chloroplast)	0	0	1	34	1	36
photosystem II Q (chloroplast)	1	0	0	16	19	36
plasma membrane calcium-transporting ATPase 4	17	9	3	3	4	36
reverse transcriptase domain-containing protein, partial	0	0	0	27	9	36
SNF2 family N-terminal domain-domain-containing protein	10	4	2	12	8	36
translationally-controlled tumor protein, partial	4	13	5	6	8	36
transport protein Sec61 alpha subunit	22	3	2	5	4	36
uncharacterized protein BYT42DRAFT_490574	0	3	1	26	6	36
uncharacterized protein DICPUDRAFT_46175	8	4	1	11	12	36
uncharacterized protein HETIRDRAFT_472219	12	9	4	2	9	36
uncharacterized protein K450DRAFT_222356	15	11	7	1	2	36
uncharacterized protein LACBIDRAFT_174940	10	6	0	16	4	36
uncharacterized protein MONBRDRAFT_11373	0	1	5	27	3	36
uncharacterized protein MONBRDRAFT_18575, partial	15	6	4	6	5	36
uncharacterized protein PgNI_04991	0	10	4	12	10	36
uncharacterized protein SAPINGB_P001443	16	6	4	5	5	36
uncharacterized protein SERLADRAFT_463762	5	14	6	4	7	36
UPF0057-domain-containing protein	2	9	0	17	8	36
1,3-beta-D-glucan synthase	7	2	2	23	1	35
60S ribosomal protein L17	7	14	3	6	5	35
DDX5, DBP2, ATP-dependent RNA helicase DDX5/DBP2	3	3	4	16	9	35
HECTc domain-containing protein	8	3	3	14	7	35
hypothetical protein CAOG_02460	10	5	9	5	6	35
hypothetical protein SAMD00019534_017380	5	16	5	6	3	35
hypothetical protein SAMD00019534_106330	7	9	16	1	2	35
hypothetical protein SNOG_13014	26	5	1	0	3	35
hypothetical protein TDEL_0E00670	12	9	9	5	0	35
kinase	3	7	2	16	7	35
major facilitator superfamily domain-containing protein	0	3	3	29	0	35
MFS transporter, SP family, sugar:H+ symporter	2	26	2	5	0	35
photosystem I P700 chlorophyll a apoprotein A1 (plastid)	3	1	3	22	6	35
PITH domain-containing protein	7	8	10	6	4	35
polymerase III polypeptide B	5	4	2	16	8	35
putative GPI-anchored cupredoxin	0	0	0	30	5	35
putative methylcrotonoyl-CoA carboxylase beta chain, mitochondrial	13	3	7	9	3	35
ribosomal protein L10-domain-containing protein	9	7	4	11	4	35
RNA polymerase II largest subunit	13	1	2	14	5	35
t-SNARE	19	3	3	3	7	35
thiolase	13	8	6	5	3	35
ubiquitin elongating factor core-domain-containing protein	2	8	6	13	6	35
uncharacterized protein B0P05DRAFT_522513	18	4	7	6	0	35
uncharacterized protein BDB00DRAFT_286742	13	6	3	6	7	35
uncharacterized protein BYT42DRAFT_490201	21	2	1	11	0	35
uncharacterized protein C8R40DRAFT_1126815	17	14	3	0	1	35
uncharacterized protein EV420DRAFT_1767988	0	0	0	31	4	35
uncharacterized protein HD553DRAFT_303961	23	4	5	0	3	35
uncharacterized protein KUCA_T00005961001	10	9	9	6	1	35
uncharacterized protein MONBRDRAFT_17747	15	3	7	7	3	35
uncharacterized protein MSY001_2634	4	9	13	6	3	35
uncharacterized protein PTSG_08233	11	4	2	14	4	35
uncharacterized protein SPPG_00697	20	1	4	9	1	35
DNA-dependent RNA polymerase II second largest subunit	9	5	4	8	8	34
DUF1943 domain-containing protein, partial	0	0	0	30	4	34
eS10 family ribosomal protein, partial	20	7	4	1	2	34
Fibrillarin-domain-containing protein	2	1	8	9	14	34
glyoxal oxidase precursor	0	0	0	29	5	34
hypothetical protein BCV69DRAFT_248721	11	7	6	4	6	34
hypothetical protein CAOG_08388, partial	7	7	6	11	3	34
hypothetical protein GLOIN_2v1570117	14	3	1	12	4	34
hypothetical protein SPRG_05291	15	5	2	7	5	34
imidazoleglycerol phosphate synthase	14	3	8	8	1	34
magnesium-protoporphyrin IX monomethyl ester cyclase (plastid)	1	17	12	1	3	34
MULTISPECIES: glycoside hydrolase family 9 protein	28	2	3	1	0	34
NAD(P)/FAD-dependent oxidoreductase	13	8	9	2	2	34
phosphotransferase family protein	10	11	6	6	1	34
PRMT5 arginine-N-methyltransferase-domain-containing protein	7	8	2	13	4	34
protein phosphatase methylesterase	5	5	6	10	8	34
regulator of nonsense transcripts	9	5	7	9	4	34
STE/STE20/TAO protein kinase	3	5	1	15	10	34
transaldolase	13	5	4	8	4	34
uncharacterized protein AGABI1DRAFT_113550	13	10	6	1	4	34
uncharacterized protein BDV38DRAFT_252275, partial	10	6	4	8	6	34
uncharacterized protein BHQ10_001298	2	3	3	15	11	34
uncharacterized protein DICPUDRAFT_81345	6	7	6	8	7	34
uncharacterized protein FDP41_009374	21	7	4	1	1	34
uncharacterized protein FIBRA_04348	10	4	4	8	8	34
uncharacterized protein FOMMEDRAFT_104428	0	0	0	28	6	34
uncharacterized protein GSPATT00014966001	2	1	2	17	12	34
uncharacterized protein JN550_011422	6	12	5	4	7	34
uncharacterized protein L969DRAFT_40646	14	6	9	1	4	34
uncharacterized protein LY89DRAFT_607663	14	4	8	4	4	34
60S ribosomal protein L13	11	5	4	10	3	33
60S ribosomal protein L1Ae	18	6	2	5	2	33
actin binding protein	17	1	4	6	5	33
adenosylhomocysteinase	1	0	0	19	13	33
bifunctional 3'-phosphoadenosine 5'-phosphosulfate synthase	18	2	4	6	3	33
chromodomain-helicase-DNA-binding protein 7	3	10	8	7	5	33
cytochrome c1, heme protein, mitochondrial	8	5	8	3	9	33
disulfide isomerase	4	12	2	13	2	33
DUF1162-domain-containing protein	9	5	4	11	4	33
Endopeptidase, putative	7	8	14	3	1	33
ferritin-like superfamily	7	8	7	5	6	33
GMC oxidoreductase-domain-containing protein	0	0	0	31	2	33
hypothetical protein PHYBLDRAFT_157664	16	5	7	4	1	33
hypothetical protein PHYSODRAFT_553979	10	8	8	5	2	33
hypothetical protein POSPLADRAFT_1038988	0	0	0	26	7	33
hypothetical protein SAMD00019534_023190	8	9	3	11	2	33
hypothetical protein SAMD00019534_047050	11	1	1	13	7	33
hypothetical protein SPRG_21025	1	8	2	14	8	33
lipase	0	0	0	23	10	33
mthfd1 protein	21	4	4	3	1	33
photosystem II cytochrome b559 beta subunit (chloroplast)	4	1	3	23	2	33
protein arginine Nmethyltransferase	1	8	3	15	6	33
putative serine/threonine kinase putativeprotein kinase	4	7	2	11	9	33
response regulator	6	8	5	13	1	33
serine/threonine protein phosphatase 2B catalytic subunit 2	10	9	7	7	0	33
Transitional endoplasmic reticulum ATPase	29	2	2	0	0	33
uncharacterized protein BDF20DRAFT_827793	3	9	5	9	7	33
uncharacterized protein BX661DRAFT_136329, partial	9	7	1	11	5	33
uncharacterized protein CcaverHIS019_0705490	10	3	3	9	8	33
uncharacterized protein DICPUDRAFT_159415	4	7	8	13	1	33
uncharacterized protein K450DRAFT_241002	3	8	11	6	5	33
uncharacterized protein MONBRDRAFT_19938, partial	8	5	1	12	7	33
uncharacterized protein NUU61_005203	4	2	3	22	2	33
uncharacterized protein SPPG_03136	15	5	1	9	3	33
30S ribosomal protein S30e, partial	9	2	0	18	3	32
AAA ATPase cdc48	11	4	4	8	5	32
ATP-NAD kinase-like domain-containing protein	0	13	15	3	1	32
ATP synthase CF0 subunit IV (chloroplast)	5	4	2	18	3	32
cyclic nucleotide-binding-like protein	22	1	1	5	3	32
cyclophilin	11	5	3	4	9	32
eukaryotic translation elongation factor 2	0	3	6	20	3	32
general amidase	22	0	3	7	0	32
glycoside hydrolase family 13 protein	0	0	0	28	4	32
glycosyl hydrolase-like protein	3	18	10	1	0	32
H+-transporting ATPase	8	9	1	11	3	32
heat shock protein 83	4	10	8	3	7	32
hypothetical protein EMIHUDRAFT_70323	7	8	3	9	5	32
hypothetical protein PHYSODRAFT_353636	13	3	10	2	4	32
hypothetical protein POSPLADRAFT_1145019, partial	22	2	1	4	3	32
hypothetical protein PPTG_03835	16	6	7	3	0	32
LAGLIDADG homing endonuclease (mitochondrion)	0	0	0	30	2	32
lupus La protein	5	7	4	12	4	32
nucleolar GTP-binding protein, putative	7	4	1	15	5	32
peptidyl-prolyl cis-trans isomerase-like protein	4	4	4	12	8	32
photosystem II D1	1	4	0	24	3	32
polyubiquitin, variant	12	7	10	1	2	32
prohibitin	11	4	5	7	5	32
pyridoxal phosphate-dependent enzyme beta subunit	9	7	4	4	8	32
ribulose-bisphosphate carboxylase large subunit, partial	7	6	6	12	1	32
SNF2 chromatin remodeling protein	11	7	7	4	3	32
UDP-GlcNAc: peptide-N-acetylglucosaminyltransferase, family GT41	0	7	7	8	10	32
uncharacterized protein AGABI1DRAFT_42433	3	7	2	11	9	32
uncharacterized protein BHQ10_008253	5	5	5	10	7	32
uncharacterized protein BXZ73DRAFT_37396	0	0	0	31	1	32
uncharacterized protein DIURU_003588	14	4	5	8	1	32
uncharacterized protein E1B28_006078	18	0	4	5	5	32
uncharacterized protein EV420DRAFT_1762598	0	0	0	25	7	32
uncharacterized protein HETIRDRAFT_389466	17	4	4	5	2	32
uncharacterized protein K444DRAFT_517552	7	0	1	15	9	32
uncharacterized protein KL911_005188, partial	3	3	0	20	6	32
actin family	7	8	2	10	4	31
ATP synthase F1, beta subunit	5	6	5	9	6	31
Atp6v0a1 protein	6	7	4	9	5	31
calcium-transporting ATPase	4	6	3	9	9	31
chitin deacetylase	4	7	4	16	0	31
Cobp (mitochondrion)	0	0	0	18	13	31
diacylglycerol kinase beta	13	6	6	5	1	31
eukaryotic translation initiation factor 4E class I	8	10	7	6	0	31
glycosyl hydrolases family 31-domain-containing protein	19	5	3	2	2	31
heparinase II/III family protein	0	0	0	21	10	31
histone H2B	5	2	1	22	1	31
hypothetical protein M430DRAFT_17065	12	8	0	6	5	31
hypothetical protein Pst134EA_017949	5	5	1	11	9	31
NADPH cytochrome P450 reductase	10	5	7	5	4	31
NADPH oxidase B	0	4	0	21	6	31
NADPH oxidase isoform 1	0	1	0	26	4	31
phosphoribosylaminoimidazole-succinocarboxamide synthase	9	6	6	9	1	31
putative DUF625 domain protein	8	5	5	7	6	31
putative eukaryotic translation initiation factor 5a-2 protein	3	5	6	14	3	31
sterol binding ankyrin repeat protein	9	4	7	3	8	31
uncharacterized protein BU26DRAFT_449399	20	4	3	0	4	31
uncharacterized protein EV420DRAFT_1644196	0	0	0	29	2	31
uncharacterized protein K450DRAFT_259612	2	10	6	9	4	31
uncharacterized protein MONBRDRAFT_31396	7	2	4	10	8	31
uncharacterized protein MONBRDRAFT_35405	0	0	2	20	9	31
uncharacterized protein PGUG_00867	18	3	4	5	1	31
uncharacterized protein PHACADRAFT_163784	5	8	8	4	6	31
uncharacterized protein SmJEL517_g00761	4	14	7	2	4	31
vacuolar ATPase B subunit	16	2	3	5	5	31
vesicle-associated membrane protein 714	6	8	1	10	6	31
WD40 repeat domain-containing protein	9	4	6	10	2	31
50S ribosomal protein L4	0	0	0	21	9	30
ABC transporter E family member 2	4	8	1	11	6	30
calcium/calmodulindependent protein kinase	4	5	5	11	5	30
CK1/CK1/CK1-G protein kinase	12	3	5	9	1	30
cyclophilin-like domain-containing protein	6	6	6	9	3	30
DnaJ-domain-containing protein, partial	12	7	1	4	6	30
glutathione reductase	24	0	3	3	0	30
GTPase	16	3	1	7	3	30
hypothetical protein AGABI2DRAFT_192516	13	6	6	5	0	30
hypothetical protein H310_06277	0	13	4	5	8	30
hypothetical protein PPTG_15137	9	3	8	3	7	30
hypothetical protein SPRG_22279	7	14	3	3	3	30
inorganic phosphate carrier protein	5	3	0	17	5	30
maltose alpha-D-glucosyltransferase	15	2	0	11	2	30
Metalloenzyme, LuxS/M16 peptidase-like protein	13	5	8	3	1	30
methylenetetrahydrofolate reductase-domain-containing protein	9	7	6	7	1	30
methylmalonate-semialdehyde dehydrogenase (acylating)	7	5	6	10	2	30
MIP family channel protein	18	0	2	8	2	30
MULTISPECIES: elongation factor G	10	9	6	3	2	30
MULTISPECIES: photosystem I core protein PsaB	3	0	0	24	3	30
P-type ATPase (P-ATPase) Superfamily	8	5	4	11	2	30
PBS lyase HEATlike repeat domain containing protein	19	3	4	2	2	30
phosphoenolpyruvate carboxykinase (GTP)	0	0	0	13	17	30
photosystem I P700 chlorophyll a apoprotein A2 (chloroplast)	0	0	1	28	1	30
photosystem I P700 chlorophyll a apoprotein A2 (plastid)	4	1	2	19	4	30
photosystem II P680 chlorophyll A apoprotein (plastid)	0	0	0	30	0	30
protein disulfide-isomerase A1	19	1	5	2	3	30
protein kinase	2	6	3	11	8	30
UDP-N-acetylglucosamine-1-P transferase	10	9	6	2	3	30
uncharacterized protein BATDEDRAFT_35901	17	2	6	4	1	30
uncharacterized protein BATDEDRAFT_9167	15	6	8	0	1	30
uncharacterized protein BC939DRAFT_491032	14	4	5	4	3	30
uncharacterized protein BP5553_02293	0	0	0	30	0	30
uncharacterized protein C9374_008905	13	4	4	6	3	30
uncharacterized protein CKM354_000105800	1	6	16	3	4	30
uncharacterized protein DICSQDRAFT_139207	25	0	2	0	3	30
uncharacterized protein KL911_002250	3	7	12	0	8	30
uncharacterized protein MONBRDRAFT_27958	0	5	7	14	4	30
uncharacterized protein N7446_012975	7	3	6	10	4	30
uncharacterized protein OGAPHI_002109	11	7	1	7	4	30
uncharacterized protein PC9H_011630	0	0	0	30	0	30
uncharacterized protein PHACADRAFT_248102	6	7	7	6	4	30
Yippee zinc-binding protein, putative	21	4	2	2	1	30
30S ribosomal protein S13, partial	4	1	1	17	6	29
60S ribosomal protein L5e	15	3	1	6	4	29
ATP-dependent rRNA helicase RRP3	6	2	4	8	9	29
Calreticulin family-domain-containing protein	2	3	1	17	6	29
cation-transporting P-type ATPase, partial	12	2	5	4	6	29
Cu-transporting P-type ATPase	17	3	2	7	0	29
elongation factor 1alpha, somatic form, putative, partial	8	2	1	9	9	29
histone H3	2	4	4	14	5	29
hypothetical protein AGABI2DRAFT_192052	2	9	6	6	6	29
hypothetical protein BO95DRAFT_242615	4	2	3	10	10	29
hypothetical protein POSPLADRAFT_1060977	5	5	8	7	4	29
MULTISPECIES: F0F1 ATP synthase subunit B	0	0	0	20	9	29
MULTISPECIES: photosystem II chlorophyll-binding protein CP47	1	0	0	27	1	29
phosphoribosyl pyrophosphokinase	10	4	2	12	1	29
photosystem I core protein PsaA, partial	0	1	0	21	7	29
SAPS-domain-containing protein	15	4	1	6	3	29
serine-threonine protein kinase, putative	2	4	8	10	5	29
serine/threonine kinase family	8	3	0	11	7	29
SNF2-family ATP dependent chromatin remodeling factor snf21	5	5	1	18	0	29
thioredoxin family protein	15	1	0	7	6	29
TKL/LISK/LIMK protein kinase	18	5	1	1	4	29
ubiquitin, partial	13	5	2	7	2	29
uncharacterized protein B0H18DRAFT_1144342	15	8	2	2	2	29
uncharacterized protein C7974DRAFT_80326	9	2	9	2	7	29
uncharacterized protein C9374_013776	11	4	0	11	3	29
uncharacterized protein CC85DRAFT_329688	7	6	4	8	4	29
uncharacterized protein DICPUDRAFT_99974	6	4	2	15	2	29
uncharacterized protein E1B28_001660	18	4	2	3	2	29
uncharacterized protein E1B28_005997	10	6	6	6	1	29
uncharacterized protein GLOTRDRAFT_134148	11	1	8	8	1	29
uncharacterized protein K450DRAFT_219160	7	5	1	10	6	29
uncharacterized protein LACBIDRAFT_183424	7	5	6	8	3	29
uncharacterized protein MONBRDRAFT_14293	1	8	4	5	11	29
uncharacterized protein MONBRDRAFT_37970	3	8	7	9	2	29
uncharacterized protein N657DRAFT_703577	13	3	9	1	3	29
uncharacterized protein PUNSTDRAFT_60050, partial	0	0	0	24	5	29
40S ribosomal protein S1	20	0	1	5	2	28
adenosine/AMP deaminase	3	8	8	4	5	28
Arf family guanine nucleotide exchange factor SEC7	11	6	1	8	2	28
ATP-dependent RNA helicase DDX5/DBP2	4	3	2	8	11	28
ATP-NAD kinase	14	6	4	1	3	28
ATP synthase CF1 subunit beta (chloroplast)	4	1	0	18	5	28
cytoskeleton assembly control protein	0	0	0	27	1	28
D-xylose-proton symporter	7	16	0	3	2	28
Glc-6-P isomerase	6	4	10	5	3	28
heat shock protein	4	6	4	6	8	28
heat shock protein 90, putative	5	5	10	5	3	28
hypothetical protein AGABI2DRAFT_62578	5	6	6	4	7	28
hypothetical protein SARC_00490	8	3	7	8	2	28
hypothetical protein SPRG_21424	7	13	3	5	0	28
luminal-binding protein 5	12	4	2	3	7	28
MULTISPECIES: glutathione peroxidase	4	2	12	2	8	28
NADPH oxidase A	0	0	0	22	6	28
NUC071 domain-containing protein	2	1	2	18	5	28
peptidyl-prolyl cis-trans isomerase 1	16	3	3	6	0	28
peroxisomal acyl-coenzyme A oxidase 1	11	7	3	3	4	28
Polyadenylate-binding protein	0	4	6	11	7	28
sugar transporter	16	8	2	2	0	28
uncharacterized protein BDZ99DRAFT_159546	0	0	0	27	1	28
uncharacterized protein BU26DRAFT_529297	19	4	2	2	1	28
uncharacterized protein H6S33_005314	0	0	0	27	1	28
uncharacterized protein HETIRDRAFT_36706	6	3	3	11	5	28
uncharacterized protein HETIRDRAFT_408465	19	1	4	3	1	28
uncharacterized protein J4E87_000504	5	1	6	10	6	28
uncharacterized protein K450DRAFT_226624	12	3	2	6	5	28
uncharacterized protein L969DRAFT_84805	11	5	2	7	3	28
uncharacterized protein MELLADRAFT_75544	7	6	4	2	9	28
uncharacterized protein MONBRDRAFT_32978	0	0	0	23	5	28
uncharacterized protein MONBRDRAFT_9993	5	3	10	9	1	28
uncharacterized protein MSY001_3281	21	0	4	2	1	28
uncharacterized protein N7516_009593	7	8	5	4	4	28
uncharacterized protein PGTG_04671	20	3	5	0	0	28
zinc metallochaperone GTPase ZigA	6	2	11	4	5	28
Aldehyde oxidase GLOX	0	0	0	22	5	27
amino acid transporter	0	0	0	24	3	27
aminoadipic semialdehyde synthase	10	11	4	1	1	27
ANTH-domain-containing protein	9	5	2	9	2	27
cathepsin B	8	9	5	0	5	27
G protein alpha-subunit	0	0	0	27	0	27
GIY-YIG homing endonuclease, partial (mitochondrion)	0	0	0	27	0	27
HAD-IC family P-type ATPase	12	2	5	8	0	27
hsp70-like protein	5	1	7	13	1	27
hypothetical protein AURANDRAFT_15631, partial	9	4	6	4	4	27
hypothetical protein AURANDRAFT_32318, partial	11	10	2	2	2	27
hypothetical protein POSPLADRAFT_1048680	5	2	7	8	5	27
hypothetical protein POSPLADRAFT_1075028	1	4	8	5	9	27
hypothetical protein PPTG_16688	6	9	4	4	4	27
hypothetical protein SAMD00019534_061790, partial	0	11	5	5	6	27
hypothetical protein, partial (mitochondrion)	0	0	0	15	12	27
lipoxygenase family protein	13	0	0	9	5	27
methylcrotonoyl-CoA carboxylase subunit alpha, mitochondrial	6	10	3	8	0	27
myosin-9	0	1	1	18	7	27
NADH-plastoquinone oxidoreductase subunit 1 (chloroplast)	7	3	10	5	2	27
NADH-quinone oxidoreductase subunit H	0	0	0	20	7	27
phospholipid-translocating ATPase	15	1	0	8	3	27
Ribosomal protein L18a	14	5	0	1	7	27
ribosomal protein L37ae	6	4	2	7	8	27
ribosomal protein S4	8	1	3	10	5	27
uncharacterized protein BU26DRAFT_569399	0	0	0	27	0	27
uncharacterized protein DACRYDRAFT_60996	14	1	6	2	4	27
uncharacterized protein DICSQDRAFT_170448	5	3	1	12	6	27
uncharacterized protein E0L32_000011	0	0	0	26	1	27
uncharacterized protein L969DRAFT_101547	1	10	9	6	1	27
uncharacterized protein MONBRDRAFT_25909	14	3	3	5	2	27
uncharacterized protein MONBRDRAFT_44312	8	5	5	7	2	27
uncharacterized protein O0I10_002756	8	1	4	12	2	27
uncharacterized protein OGAPHI_003043	10	4	6	7	0	27
uncharacterized protein PC9H_004157	6	3	1	8	9	27
uncharacterized protein PFL1_01000	15	3	7	0	2	27
uncharacterized protein PV09_07408	0	0	0	27	0	27
uncharacterized protein SmJEL517_g00095	11	3	1	6	6	27
uncharacterized protein SmJEL517_g01857	9	3	4	6	5	27
uncharacterized protein W97_04406	4	8	5	9	1	27
YALI0D24750p	9	2	5	4	7	27
20S proteasome subunit	15	3	3	3	2	26
50S ribosomal protein L30e-like protein, partial	1	5	9	7	4	26
alpha-glucosidase	4	2	1	16	3	26
arginine N-methyltransferase 1, putative	18	4	3	1	0	26
ATP-binding Cassette (ABC) Superfamily	15	8	1	2	0	26
ATP-binding protein	18	1	2	1	4	26
ATP-dependent DEAD/H RNA helicase, putative	7	5	2	5	7	26
ATP-dependent DNA ligase	10	3	9	3	1	26
copper transporting p-type ATPase-like protein	13	4	3	4	2	26
cyclin-like protein	4	6	7	9	0	26
cytochrome b6-f complex subunit IV	2	1	1	22	0	26
cytochrome b6/f complex subunit 4 (chloroplast)	0	1	1	23	1	26
DRS2	5	3	5	13	0	26
ESC reductase	19	0	5	0	2	26
F-type H+-transporting ATPase subunit beta	7	8	5	6	0	26
glucose-6-phosphate dehydrogenase	8	0	0	8	10	26
GTP-binding protein of the rab/ypt	15	2	2	4	3	26
heat shock protein 70	2	1	3	18	2	26
hypothetical protein BCR41DRAFT_386986	7	6	4	9	0	26
hypothetical protein EMIHUDRAFT_196296	9	6	3	2	6	26
hypothetical protein PHYSODRAFT_260141	11	3	7	5	0	26
hypothetical protein POSPLADRAFT_1171250	10	8	6	2	0	26
MULTISPECIES: acyl carrier protein	11	9	4	1	1	26
NADPH oxidase	0	0	0	22	4	26
phosphatase, partial	4	6	1	9	6	26
phosphoinositide-3-kinase	4	6	8	5	3	26
photosystem II 44 kDa protein (chloroplast)	1	4	0	16	5	26
Putative DNA helicase ino80	7	3	6	5	5	26
reverse transcriptase family protein	0	0	0	19	7	26
RNA-binding region-containing protein (RNP-1)	6	3	0	11	6	26
SERCA-type calcium-translocating P-type ATPase	7	6	6	2	5	26
similar to 1-acylglycerol-3-phosphate O-acyltransferase	0	2	10	9	5	26
squalene epoxidase-domain-containing protein	18	0	5	0	3	26
TB2/DP1, HVA22 family-domain-containing protein	20	2	0	4	0	26
ubiquitin-conjugating enzyme e2	8	8	2	3	5	26
uncharacterized protein AGABI1DRAFT_108467	0	0	0	25	1	26
uncharacterized protein B0H18DRAFT_1017430	10	7	2	6	1	26
uncharacterized protein BDZ99DRAFT_491452	0	0	0	26	0	26
uncharacterized protein DICSQDRAFT_183510	9	4	7	0	6	26
uncharacterized protein FOMMEDRAFT_24023	12	4	7	1	2	26
uncharacterized protein K450DRAFT_215715	9	4	3	4	6	26
uncharacterized protein KL911_002807	2	2	1	9	12	26
uncharacterized protein N7468_003573	14	5	5	2	0	26
uncharacterized protein N7511_005767	9	2	7	4	4	26
uncharacterized protein NEUTE1DRAFT_121976	15	1	1	8	1	26
uncharacterized protein PFL1_02955	5	9	4	5	3	26
uncharacterized protein PtA15_9A264	2	5	3	7	9	26
uncharacterized protein SmJEL517_g05753	5	3	7	7	4	26
beta subunit of tetrameric clathrin adaptor complex AP1	7	1	4	9	4	25
ferredoxin 1-like protein	0	4	8	8	5	25
glutaredoxin	17	3	2	3	0	25
heat shock protein Hsp90 family protein	12	4	1	5	3	25
hypothetical protein CAOG_08683, partial	13	1	1	7	3	25
hypothetical protein CC1G_03266	18	0	1	6	0	25
hypothetical protein GUITHDRAFT_157803	13	2	2	4	4	25
hypothetical protein I302_04065	16	3	1	2	3	25
hypothetical protein PHYBLDRAFT_71839	7	3	3	2	10	25
hypothetical protein SAMD00019534_111680	6	4	3	7	5	25
M1 family metallopeptidase	0	8	10	5	2	25
MIP/aquaporin family protein	15	2	4	1	3	25
mRNA export shuttling protein	1	6	4	4	10	25
phenylacetyl-CoA ligase	16	2	2	3	2	25
Proteasome subunit alpha type	19	4	0	2	0	25
putative 5-3 exonuclease	4	3	3	6	9	25
R-phycoerythrin alpha subunit (chloroplast)	0	0	0	24	1	25
Retrotransposable element Tf2 protein	7	1	2	12	3	25
ribonucleotide reductase small subunit	11	7	3	2	2	25
splicing factor Prp8	2	4	1	16	2	25
STE/STE20/YSK protein kinase	10	3	1	0	11	25
translation elongation factor 1a	0	0	0	6	19	25
translation initiation factor 5A	6	1	0	9	9	25
tubulin alpha chain, partial	0	0	0	17	8	25
type A von Willebrand factor domain-containing protein	16	2	1	3	3	25
ubiquitin-activating emzyme E1	11	2	0	10	2	25
uncharacterized protein BDZ99DRAFT_391293	0	0	0	17	8	25
uncharacterized protein BGZ61DRAFT_501437	9	1	9	6	0	25
uncharacterized protein C9374_007443	14	3	2	5	1	25
uncharacterized protein DICSQDRAFT_90253	8	5	0	9	3	25
uncharacterized protein E1B28_002322	13	4	3	3	2	25
uncharacterized protein EV422DRAFT_493123	9	5	2	3	6	25
uncharacterized protein FIBRA_02624	7	4	8	3	3	25
uncharacterized protein GT037_007031	0	0	0	25	0	25
uncharacterized protein K450DRAFT_246876	2	3	4	8	8	25
uncharacterized protein MONBRDRAFT_31461	5	6	2	7	5	25
uncharacterized protein PENSOL_c023G11498	3	8	5	7	2	25
uncharacterized protein PHACADRAFT_127059	15	3	3	4	0	25
uncharacterized protein PtA15_5A68	10	3	3	4	5	25
Xpo1 protein	14	5	2	2	2	25
1,3-beta-glucan synthase component FKS1	0	1	2	20	1	24
ATP synthase subunit C family protein	7	2	3	10	2	24
carboxypeptidase H	12	1	6	2	3	24
Dynamin- GTPase protein	14	2	3	4	1	24
elongation factor 1 alpha	6	7	1	8	2	24
fibronectin type III domain-containing protein, partial	0	0	0	14	10	24
GDP dissociation inhibitor 1	16	0	1	4	3	24
glutamate synthase [NADH]	4	2	1	16	1	24
glycoside hydrolase family 11 protein	0	0	0	19	5	24
heat shock protein Ddj1	0	5	0	9	10	24
histone arginine methyltransferase PRMT1	10	7	1	5	1	24
Hsp70 family protein	5	4	4	6	5	24
Hsp90-Sba1 closed chaperone complex	1	4	17	2	0	24
hypothetical protein AURANDRAFT_54846	16	1	5	2	0	24
hypothetical protein PHYSODRAFT_516459	8	6	4	3	3	24
hypothetical protein SAMD00019534_035860	7	4	3	8	2	24
hypothetical protein SARC_07293	12	5	1	5	1	24
hypothetical protein SARC_09412, partial	9	4	1	6	4	24
hypothetical protein SNOG_13296	7	4	1	8	4	24
hypothetical protein SPRG_05205	7	2	3	4	8	24
hypothetical protein SPRG_08133, partial	2	7	10	2	3	24
kinesin family member 17	17	4	0	3	0	24
kinesin motor domain-containing protein	8	8	5	2	1	24
MULTISPECIES: NADH-quinone oxidoreductase subunit NuoH	17	3	4	0	0	24
NADH-quinone oxidoreductase subunit M	0	0	0	11	13	24
peptidyl-prolyl cis-trans isomerase cyp15	10	9	1	2	2	24
photosystem II core 34 kDa protein (chloroplast)	2	2	1	19	0	24
polymerase III polypeptide A	3	7	0	10	4	24
PTS sugar transporter subunit IIA	0	2	0	18	4	24
S-adenosylmethionine synthetase	0	0	1	13	10	24
translationally-controlled tumor protein	9	3	6	3	3	24
uncharacterized protein AGABI1DRAFT_70212	12	0	10	2	0	24
uncharacterized protein DICPUDRAFT_149604	1	1	2	12	8	24
uncharacterized protein DICPUDRAFT_154640	12	3	2	4	3	24
uncharacterized protein EDB91DRAFT_1247529	10	5	7	1	1	24
uncharacterized protein EDB93DRAFT_1089978	19	0	2	3	0	24
uncharacterized protein F5J12DRAFT_824365	12	2	2	6	2	24
uncharacterized protein HETIRDRAFT_471314	0	0	0	16	8	24
uncharacterized protein K450DRAFT_249721	14	2	6	1	1	24
uncharacterized protein LACBIDRAFT_148078, partial	12	5	3	3	1	24
uncharacterized protein LACBIDRAFT_392010	5	5	3	3	8	24
uncharacterized protein PTSG_06722	1	9	3	6	5	24
uncharacterized protein SmJEL517_g01072	8	6	3	5	2	24
uncharacterized protein SmJEL517_g05289	4	6	5	6	3	24
V-type proton ATPase proteolipid subunit	17	2	3	2	0	24
30S ribosomal protein S11	5	0	1	12	5	23
60s acidic ribosomal protein-domain-containing protein	0	12	7	4	0	23
acetohydroxyacid synthetase large subunit (chloroplast)	3	0	0	12	8	23
Acetyl-CoA carboxylase	21	0	0	2	0	23
ADP-ribosylation factor 1	14	2	0	2	5	23
aldehyde dehydrogenase (NADP(+)) ald6, variant 2	1	4	4	7	7	23
aldose epimerase family protein	3	6	3	8	3	23
allophycocyanin gamma subunit (chloroplast)	0	1	0	22	0	23
ankyrin repeat domain-containing protein, partial	17	2	3	1	0	23
ATP-binding cassette transporter 1, partial	13	3	0	7	0	23
ATPase 6, plasma membrane-type	5	8	2	6	2	23
Dyp peroxidase	0	0	0	23	0	23
ferritin-like domain-containing protein	0	0	0	23	0	23
GroES-like protein	3	1	7	10	2	23
GTPase of the Ypt/Rab family	4	5	4	10	0	23
heat shock protein 70 family	1	1	6	13	2	23
hydroxymethylglutaryl-CoA reductase (NADPH)	6	4	1	9	3	23
hypothetical protein CAOG_08980, partial	0	0	0	19	4	23
hypothetical protein GLOIN_2v1625103	8	3	1	4	7	23
hypothetical protein KAFR_0E00560	16	0	1	3	3	23
hypothetical protein POSPLADRAFT_1038057	2	4	3	9	5	23
Importin N-terminal domain-containing protein	8	6	2	6	1	23
Inorganic phosphate transporter pho84	0	0	0	22	1	23
LIM-domain-containing protein	5	4	5	7	2	23
multidrug resistance-associated ABC transporter	4	3	6	8	2	23
nucleotide-sugar transporter-domain-containing protein	4	5	5	7	2	23
Oxalate decarboxylase OxdC	0	0	0	18	5	23
oxoglutarate dehydrogenase (succinyl-transferring), E1 component	5	4	2	10	2	23
photosystem II 47 kDa protein (chloroplast)	0	0	0	23	0	23
PLU-1-like protein	13	4	4	2	0	23
putative ATP-dependent DEAD/H RNA helicase	5	6	3	7	2	23
putative glycine hydroxymethyltransferase	5	1	6	8	3	23
ribosomal L18p/L5e family	0	6	2	5	10	23
ribosomal protein L10e/L16	1	0	0	20	2	23
succinate dehydrogenase subunit 2 (mitochondrion)	0	0	0	20	3	23
thioredoxin	4	2	3	10	4	23
ubiquitin/ribosomal fusion protein, putative	2	0	0	20	1	23
uncharacterized protein COCC4DRAFT_121055, partial	0	1	0	19	3	23
uncharacterized protein E1B28_000070	0	0	0	22	1	23
uncharacterized protein FIBRA_02947	4	10	6	3	0	23
uncharacterized protein FIBRA_05120	13	6	4	0	0	23
uncharacterized protein K450DRAFT_181607, partial	0	0	0	18	5	23
uncharacterized protein K450DRAFT_218674	3	6	4	6	4	23
uncharacterized protein K450DRAFT_219247	0	6	8	6	3	23
uncharacterized protein K450DRAFT_245150	9	2	0	6	6	23
uncharacterized protein LAJ45_07928	10	8	3	2	0	23
uncharacterized protein LAJ45_08318	2	0	4	11	6	23
uncharacterized protein PC9H_001913	12	4	1	4	2	23
uncharacterized protein PHACADRAFT_172519	1	2	12	8	0	23
uncharacterized protein PHACADRAFT_246014	11	2	3	6	1	23
uncharacterized protein SCHCODRAFT_02615369	0	0	0	21	2	23
xylitol dehydrogenase	9	6	5	3	0	23
[truncated: 3,405 more rows]
